# Supplementary material for: Interferon and B-cell Signatures Inform Precision Medicine in Lupus Nephritis
Source: PubMed Central journal article supplement (PMC11184261; doi:10.1016/j.ekir.2024.03.014), 2024-03-13
Supplement: mmc1.pdf [file mmc1.pdf]

# Supplementary Material

## Table of contents

|                                                                                                                                                                    |    |
|--------------------------------------------------------------------------------------------------------------------------------------------------------------------|----|
| Supplementary Table S1. Main inclusion and exclusion criteria.....                                                                                                 | 4  |
| Supplementary Table S2. Modified STROBE statement checklist .....                                                                                                  | 5  |
| List of local investigators from the participating clinical sites .....                                                                                            | 8  |
| Supplementary Table S3. Renal disease activity in LN subgroups .....                                                                                               | 9  |
| Supplementary Table S4. Correlations between serological markers and z-scores of the “B cell” gene module in patients with LN.....                                 | 10 |
| Supplementary Table S5. Correlations between serological markers and z-scores of the “cell cycle, mitotic phase” gene module in patients with LN.....              | 11 |
| Supplementary Table S6. Correlations between serological markers and z-scores of the “CORO1A-DEF6 network” gene module in patients with LN.....                    | 12 |
| Supplementary Table S7. Correlations between serological markers and z-scores of the “enriched in antigen presentation (III)” gene module in patients with LN..... | 13 |
| Supplementary Table S8. Correlations between serological markers and z-scores of the “enriched in neutrophils (II)” gene module in patients with LN .....          | 14 |
| Supplementary Table S9. Correlations between serological markers and z-scores of the “erythrocytes” gene module in patients with LN .....                          | 15 |
| Supplementary Table S10. Correlations between serological markers and z-scores of the “extracellular matrix (I)” gene module in patients with LN .....             | 16 |
| Supplementary Table S11. Correlations between serological markers and z-scores of the “extracellular region cluster” gene module in patients with LN.....          | 17 |
| Supplementary Table S12. Correlations between serological markers and z-scores of the “inflammation (IV)” gene module in patients with LN .....                    | 18 |
| Supplementary Table S13. Correlations between serological markers and z-scores of the “inflammation (VI)” gene module in patients with LN .....                    | 19 |
| Supplementary Table S14. Correlations between serological markers and z-scores of the “inositol phosphate metabolism” gene module in patients with LN.....         | 20 |
| Supplementary Table S15. Correlations between serological markers and z-scores of the “interferon” gene module in patients with LN.....                            | 21 |
| Supplementary Table S16. Correlations between serological markers and z-scores of the “interferon (II)” gene module in patients with LN.....                       | 22 |
| Supplementary Table S17. Correlations between serological markers and z-scores of the “MAPK, RAS signalling” gene module in patients with LN.....                  | 23 |

|                                                                                                                                                                                 |    |
|---------------------------------------------------------------------------------------------------------------------------------------------------------------------------------|----|
| Supplementary Table S18. Correlations between serological markers and z-scores of the “monocytes” gene module in patients with LN .....                                         | 24 |
| Supplementary Table S19. Correlations between serological markers and z-scores of the “plasma cells, immunoglobulins” gene module in patients with LN.....                      | 25 |
| Supplementary Table S20. Correlations between serological markers and z-scores of the “platelets” gene module in patients with LN .....                                         | 26 |
| Supplementary Table S21. Correlations between serological markers and z-scores of the “protein synthesis (I)” gene module in patients with LN.....                              | 27 |
| Supplementary Table S22. Correlations between serological markers and z-scores of the “regulation of antigen presentation and immune response” gene module in patients with LN. | 28 |
| Supplementary Table S23. Correlations between serological markers and z-scores of the “regulation of transcription, transcription factors” gene module in patients with LN..... | 29 |
| Supplementary Table S24. Z-scores of replicated gene modules in patients with LN and anti- $\beta$ GPI IgG positivity versus negative patients.....                             | 30 |
| Supplementary Table S25. Z-scores of replicated gene modules in patients with LN and aCL IgG positivity versus negative patients .....                                          | 31 |
| Supplementary Table S26. Z-scores of replicated gene modules in patients with LN and low versus normal/high levels of C3c.....                                                  | 32 |
| Supplementary Table S27. Z-scores of replicated gene modules in patients with LN and low versus normal/high levels of C4.....                                                   | 33 |
| Supplementary Table S28. Z-scores of replicated gene modules in patients with LN and anti-chromatin positivity versus negative patients .....                                   | 34 |
| Supplementary Table S29. Z-scores of replicated gene modules in patients with LN and anti-dsDNA positivity versus negative patients .....                                       | 35 |
| Supplementary Table S30. Z-scores of replicated gene modules in patients with LN and anti-SSA-52 positivity versus negative patients.....                                       | 36 |
| Supplementary Table S31. Z-scores of replicated gene modules in patients with LN and anti-SSA-60 positivity versus negative patients.....                                       | 37 |
| Supplementary Table S32. Z-scores of replicated gene modules in patients with LN and anti-U1RNP positivity versus negative patients.....                                        | 38 |
| Supplementary Table S33. The most enriched signalling molecule networks in patients with LN .....                                                                               | 39 |
| Supplementary Figure S1. The <i>NRF1</i> signalling molecule network and annotated drug targets in patients with lupus nephritis .....                                          | 40 |
| Supplementary Figure S2. The <i>YY1</i> signalling molecule network and annotated drug targets in patients with lupus nephritis.....                                            | 41 |
| Supplementary Figure S3. The <i>ZBTB33</i> signalling molecule network and annotated drug targets in patients with lupus nephritis.....                                         | 42 |
| Supplementary Figure S4. The <i>PRDM2</i> signalling molecule network and annotated drug targets in patients with lupus nephritis.....                                          | 43 |

Supplementary Table S34. Response scores to selected targets in patients with LN .....44  
Supplementary Table S35. LN patients with anticipated response to selected drug targets .....45

## Supplementary Table S1. Main inclusion and exclusion criteria

| Inclusion criteria                                                                                                                                                                                                                                    | Exclusion criteria                                                                                                                                                                                                                                                                                                                                                                                                                                                                                                                                                                                                                                                                                                                                                                                                                                                                                                                                                                                                                                                                                                                                                                                                                                                                                                                                                                                                                                                                                                                                                                                                                                                                                                                                                                                                                                                                                                                                                                                                                                                                          |
|-------------------------------------------------------------------------------------------------------------------------------------------------------------------------------------------------------------------------------------------------------|---------------------------------------------------------------------------------------------------------------------------------------------------------------------------------------------------------------------------------------------------------------------------------------------------------------------------------------------------------------------------------------------------------------------------------------------------------------------------------------------------------------------------------------------------------------------------------------------------------------------------------------------------------------------------------------------------------------------------------------------------------------------------------------------------------------------------------------------------------------------------------------------------------------------------------------------------------------------------------------------------------------------------------------------------------------------------------------------------------------------------------------------------------------------------------------------------------------------------------------------------------------------------------------------------------------------------------------------------------------------------------------------------------------------------------------------------------------------------------------------------------------------------------------------------------------------------------------------------------------------------------------------------------------------------------------------------------------------------------------------------------------------------------------------------------------------------------------------------------------------------------------------------------------------------------------------------------------------------------------------------------------------------------------------------------------------------------------------|
| <p><b>For all patients</b></p> <ul style="list-style-type: none"> <li>- Age <math>\geq 18</math> years</li> <li>- Diagnosed according to the prevailing criteria for systemic lupus erythematosus (SLE)</li> <li>- Informed consent signed</li> </ul> | <p><b>For all patients</b></p> <ul style="list-style-type: none"> <li>- Pediatric lupus</li> <li>- Drug-induced lupus</li> <li>- Severe nephrotic syndrome with proteinuria <math>\geq 3.5</math> g/day</li> <li>- Patients with stable doses of prednisone equivalent <math>&gt;15</math> mg/day for the last 3 months or with IV corticosteroids in the last 3 months</li> <li>- Patients under immunosuppressant treatment in the last 3 months prior to recruitment and patients with combined therapy using two or more immunosuppressants:               <ul style="list-style-type: none"> <li><input type="checkbox"/> Methotrexate <math>\geq 25</math>mg/week</li> <li><input type="checkbox"/> Azathioprine <math>\geq 2.5</math>mg/kg/day</li> <li><input type="checkbox"/> Cyclosporine A <math>&gt;3</math>mg/kg/day</li> <li><input type="checkbox"/> Mycophenolate mofetil <math>&gt;2</math>g/day</li> </ul> </li> <li>- Chronic HBV or HCV infection</li> <li>- Patients who are also diagnosed according to the prevailing criteria for one of the following autoimmune diseases:               <ul style="list-style-type: none"> <li><input type="checkbox"/> Rheumatoid arthritis (RA)</li> <li><input type="checkbox"/> Scleroderma or systemic sclerosis (SSc)</li> <li><input type="checkbox"/> Primary Sjögren's syndrome (pSjS)</li> <li><input type="checkbox"/> Primary antiphospholipid syndrome (pAPS)</li> <li><input type="checkbox"/> Mixed connective tissue disease (MCTD)</li> <li><input type="checkbox"/> Patients with undifferentiated connective tissue disease (UCTD) for over 1 year and that do not fulfill the diagnosis of any of the above diseases or SLE</li> </ul> </li> </ul> <p><b>For controls</b></p> <ul style="list-style-type: none"> <li>- Individuals on chronic medication</li> <li>- Individuals suffering from any inflammatory autoimmune, allergic or infectious condition, and with a history of autoimmune disease, particularly thyroid disease or other diseases that may modify cellular profiles in blood</li> </ul> |

Adapted from “Integrative Analysis Reveals a Molecular Stratification of Systemic Autoimmune Diseases.” *Arthritis Rheum.* 2021;73(6):1073-1085. Copyright 2021 by the American College of Rheumatology. Adapted with permission. IV: intravenous, HBV: hepatitis B virus, HCV: hepatitis C virus.

**Supplementary Table S2. Modified STROBE statement checklist**

| Section(s)               | Item No | Recommendation                                                                                                                                                                                                                                                                                                                                                                                                                                                         | Page No                   |
|--------------------------|---------|------------------------------------------------------------------------------------------------------------------------------------------------------------------------------------------------------------------------------------------------------------------------------------------------------------------------------------------------------------------------------------------------------------------------------------------------------------------------|---------------------------|
| Title and abstract       | 1       | (a) Indicate the study's design with a commonly used term in the title or the abstract                                                                                                                                                                                                                                                                                                                                                                                 |                           |
|                          |         | (b) Provide in the abstract an informative and balanced summary of what was done and what was found                                                                                                                                                                                                                                                                                                                                                                    | 3                         |
| Introduction             |         |                                                                                                                                                                                                                                                                                                                                                                                                                                                                        |                           |
| Background/rationale     | 2       | Explain the scientific background and rationale for the investigation being reported                                                                                                                                                                                                                                                                                                                                                                                   | 4–5                       |
| Objectives               | 3       | State specific objectives, including any prespecified hypotheses                                                                                                                                                                                                                                                                                                                                                                                                       | 5                         |
| Methods                  |         |                                                                                                                                                                                                                                                                                                                                                                                                                                                                        |                           |
| Study design             | 4       | Present key elements of study design early in the paper                                                                                                                                                                                                                                                                                                                                                                                                                | 5–8                       |
| Setting                  | 5       | Describe the setting, locations, and relevant dates, including periods of recruitment, exposure, follow-up, and data collection                                                                                                                                                                                                                                                                                                                                        | 5–6                       |
| Participants             | 6       | (a) <i>Cohort study</i> —Give the eligibility criteria, and the sources and methods of selection of participants. Describe methods of follow-up<br><i>Case-control study</i> —Give the eligibility criteria, and the sources and methods of case ascertainment and control selection. Give the rationale for the choice of cases and controls<br><i>Cross-sectional study</i> —Give the eligibility criteria, and the sources and methods of selection of participants | 5; Supplementary Material |
| Variables                | 7       | Clearly define all outcomes, exposures, predictors, potential confounders, and effect modifiers. Give diagnostic criteria, if applicable                                                                                                                                                                                                                                                                                                                               | 5–8                       |
| Data sources/measurement | 8*      | For each variable of interest, give sources of data and details of methods of assessment (measurement).                                                                                                                                                                                                                                                                                                                                                                | 5–8                       |
| Bias                     | 9       | Describe any efforts to address potential sources of bias                                                                                                                                                                                                                                                                                                                                                                                                              | 6–8                       |
| Study size               | 10      | Explain how the study size was arrived at (if applicable)                                                                                                                                                                                                                                                                                                                                                                                                              |                           |
| Quantitative variables   | 11      | Explain how quantitative variables were handled in the analyses. If applicable, describe which groupings were chosen and why                                                                                                                                                                                                                                                                                                                                           | 6–8                       |
| Statistical methods      | 12      | (a) Describe all statistical methods, including those used to control for confounding                                                                                                                                                                                                                                                                                                                                                                                  | 6–8                       |
|                          |         | (b) Describe any methods used to examine subgroups and interactions                                                                                                                                                                                                                                                                                                                                                                                                    | 7–8                       |

|                  |     |                                                                                                                                                                                                              |                              |
|------------------|-----|--------------------------------------------------------------------------------------------------------------------------------------------------------------------------------------------------------------|------------------------------|
|                  |     | (c) Explain how missing data were addressed                                                                                                                                                                  |                              |
|                  |     | (d) <i>Cohort study</i> —If applicable, explain how loss to follow-up was addressed                                                                                                                          | 6–8                          |
|                  |     | <i>Case-control study</i> —If applicable, explain how matching of cases and controls was addressed                                                                                                           |                              |
|                  |     | <i>Cross-sectional study</i> —If applicable, describe analytical methods taking account of sampling strategy                                                                                                 |                              |
|                  |     | (e) Describe any sensitivity analyses                                                                                                                                                                        |                              |
| Results          |     |                                                                                                                                                                                                              |                              |
| Participants     | 13* | (a) Report numbers of individuals at each stage of study—eg numbers potentially eligible, examined for eligibility, confirmed eligible, included in the study, completing follow-up, and analyzed            | 9–10; Supplementary Material |
|                  |     | (c) Use of a flow diagram                                                                                                                                                                                    |                              |
| Descriptive data | 14* | (a) Give characteristics of study participants (eg demographic, clinical, social) and information on exposures and potential confounders                                                                     | 9                            |
|                  |     | (b) Indicate number of participants with missing data for each variable of interest                                                                                                                          | 9; Supplementary Material    |
|                  |     | (c) <i>Cohort study</i> —Summarise follow-up time (eg, average and total amount)                                                                                                                             |                              |
| Outcome data     | 15* | <i>Cohort study</i> —Report numbers of outcome events or summary measures over time                                                                                                                          |                              |
|                  |     | <i>Case-control study</i> —Report numbers in each exposure category, or summary measures of exposure                                                                                                         |                              |
|                  |     | <i>Cross-sectional study</i> —Report numbers of outcome events or summary measures                                                                                                                           | 9-13; Supplementary Material |
| Main results     | 16  | (a) Give unadjusted estimates and, if applicable, confounder-adjusted estimates and their precision (eg, 95% confidence interval). Make clear which confounders were adjusted for and why they were included | 9-13; Supplementary Material |
| Other analyses   | 17  | Report other analyses done—eg analyses of subgroups and interactions, and sensitivity analyses                                                                                                               | 9-13; Supplementary Material |
| Discussion       |     |                                                                                                                                                                                                              |                              |
| Key results      | 18  | Summarise key results with reference to study objectives                                                                                                                                                     | 13–22                        |
| Limitations      | 19  | Discuss limitations of the study, taking into account sources of potential bias or imprecision. Discuss both direction and magnitude of any potential bias                                                   | 21–22                        |
| Interpretation   | 20  | Give a cautious overall interpretation of results considering objectives, limitations, multiplicity of analyses, results from similar studies, and other relevant evidence                                   | 13–22                        |

---

|                  |    |                                                                       |       |
|------------------|----|-----------------------------------------------------------------------|-------|
| Generalisability | 21 | Discuss the generalisability (external validity) of the study results | 21–22 |
|------------------|----|-----------------------------------------------------------------------|-------|

---

## List of local investigators from the participating clinical sites

Lorenzo Beretta<sup>1</sup>, Barbara Vigone<sup>1</sup>, Jacques-Olivier Pers<sup>2</sup>, Alain Saraux<sup>2</sup>, Valérie Devauchelle-Pensec<sup>2</sup>, Divi Cornec<sup>2</sup>, Sandrine Jousse-Joulin<sup>2</sup>, Bernard Lauwerys<sup>3</sup>, Julie Ducreux<sup>3</sup>, Anne-Lise Maudoux<sup>3</sup>, Carlos Vasconcelos<sup>4</sup>, Ana Tavares<sup>4</sup>, Esmeralda Neves<sup>4</sup>, Raquel Faria<sup>4</sup>, Mariana Brandão<sup>4</sup>, Ana Campar<sup>4</sup>, António Marinho<sup>4</sup>, Fátima Farinha<sup>4</sup>, Isabel Almeida<sup>4</sup>, Miguel Angel Gonzalez-Gay Mantecón<sup>5</sup>, Ricardo Blanco Alonso<sup>5</sup>, Alfonso Corrales Martínez<sup>5</sup>, Ricard Cervera<sup>6</sup>, Ignasi Rodríguez-Pintó<sup>6</sup>, Gerard Espinosa<sup>6</sup>, Rik Lories<sup>7</sup>, Ellen De Langhe<sup>7</sup>, Nicolas Hunzelmann<sup>8</sup>, Doreen Belz<sup>8</sup>, Torsten Witte<sup>9</sup>, Niklas Baerlecken<sup>9</sup>, Georg Stummvoll<sup>10</sup>, Michael Zauner<sup>10</sup>, Michaela Lehner<sup>10</sup>, Eduardo Collantes<sup>11</sup>, Rafaela Ortega-Castro<sup>11</sup>, M<sup>a</sup> Angeles Aguirre-Zamorano<sup>11</sup>, Alejandro Escudero-Contreras<sup>11</sup>, M<sup>a</sup> Carmen Castro-Villegas<sup>11</sup>, Norberto Ortego<sup>12</sup>, María Concepción Fernández Roldán<sup>12</sup>, Enrique Raya<sup>13</sup>, Inmaculada Jiménez Moleón<sup>13</sup>, Enrique de Ramon<sup>14</sup>, Isabel Díaz Quintero<sup>14</sup>, Pier Luigi Meroni<sup>15</sup>, Maria Gerosa<sup>15</sup>, Tommaso Schioppo<sup>15</sup>, Carolina Artusi<sup>15</sup>, Carlo Chizzolini<sup>16</sup>, Aleksandra Zuber<sup>16</sup>, Donatienne Wynar<sup>16</sup>, Laszlo Kovács<sup>17</sup>, Attila Balog<sup>17</sup>, Magdolna Deák<sup>17</sup>, Márta Bocskai<sup>17</sup>, Sonja Dulic<sup>17</sup>, Gabriella Kádár<sup>17</sup>, Falk Hiepe<sup>18</sup>, Velia Gerl<sup>18</sup>, Silvia Thiel<sup>18</sup>, Manuel Rodriguez Maresca<sup>19</sup>, Antonio López-Berrio<sup>19</sup>, Rocío Aguilar-Quesada<sup>19</sup>, Héctor Navarro-Linares<sup>19</sup>

## Affiliations

1. Referral Center for Systemic Autoimmune Diseases, Fondazione IRCCS Ca' Granda Ospedale Maggiore Policlinico di Milano, Italy
2. Centre Hospitalier Universitaire de Brest, Hospital de la Cavale Blanche, Brest, France
3. Pôle de pathologies rhumatismales systémiques et inflammatoires, Institut de Recherche Expérimentale et Clinique, Université catholique de Louvain, Brussels, Belgium
4. Centro Hospitalar do Porto, Portugal
5. Servicio Cantabro de Salud, Hospital Universitario Marqués de Valdecilla, Santander, Spain
6. Hospital Clinic I Provincia, Institut d'Investigacions Biomèdiques August Pi i Sunyer, Barcelona, Spain
7. Katholieke Universiteit Leuven, Belgium
8. Klinikum der Universitaet zu Koeln, Cologne, Germany
9. Medizinische Hochschule Hannover, Germany
10. Medical University Vienna, Vienna, Austria
11. Servicio Andaluz de Salud, Hospital Universitario Reina Sofía Córdoba, Spain
12. Servicio Andaluz de Salud, Complejo hospitalario Universitario de Granada (Hospital Universitario San Cecilio), Spain
13. Servicio Andaluz de Salud, Complejo hospitalario Universitario de Granada (Hospital Virgen de las Nieves), Spain
14. Servicio Andaluz de Salud, Hospital Regional Universitario de Málaga, Spain
15. Università degli studi di Milano, Milan, Italy
16. Hospitiaux Universitaires de Genève, Switzerland
17. University of Szeged, Szeged, Hungary
18. Charite, Berlin, Germany
19. Andalusian Public Health System Biobank, Granada, Spain



**Supplementary Table S3. Renal disease activity in LN subgroups**

| <b>Target</b>     | <b>lo-IFN<br/>subgroup<br/>N=13</b> | <b>im-IFN<br/>subgroup<br/>N=9</b> | <b>hi-IFN<br/>subgroup<br/>N=19</b> | <b>lo-IFN<br/>vs<br/>im-IFN<br/><i>p</i> value</b> | <b>lo-IFN<br/>vs<br/>hi-IFN<br/><i>p</i> value</b> | <b>im-IFN<br/>vs<br/>hi-IFN<br/><i>p</i> value</b> |
|-------------------|-------------------------------------|------------------------------------|-------------------------------------|----------------------------------------------------|----------------------------------------------------|----------------------------------------------------|
| <b>rSLEDAI-2K</b> | 7.38±3.59                           | 6.67±2.00                          | 6.95±3.49                           | 0.822                                              | 0.692                                              | 0.871                                              |

Data are presented as mean (standard deviation). All *p* values are derived from non-parametrical Mann-Whitney *U* tests. Statistically significant *p* values are in bold.

hi: high; IFN: interferon; im: intermediate; LN: lupus nephritis; lo: low; rSLEDAI-2K: renal SLE Disease Activity Index 2000.

**Supplementary Table S4. Correlations between serological markers and z-scores of the “B cell” gene module in patients with LN**

| Serological marker  | n  | Coefficient | <i>p</i> value |
|---------------------|----|-------------|----------------|
| <b>anti-MDA IgM</b> | 31 | 0.09        | 0.612          |
| <b>anti-PC IgM</b>  | 31 | -0.07       | 0.717          |
| <b>BAFF</b>         | 28 | 0.07        | 0.707          |
| <b>IL-6</b>         | 28 | 0.13        | 0.523          |
| <b>TGF-β</b>        | 28 | -0.17       | 0.376          |
| <b>TNF-α</b>        | 28 | 0.21        | 0.282          |

Spearman's rank correlation coefficients of correlations between levels of different serological markers and Z-scores of the B cell gene module. The total number of patients with available data is indicated. Statistically significant *p* values are in bold. Only comparisons with sufficient numbers of observations ( $n \geq 10$ ) are included.

BAFF: B cell activating factor belonging to the tumour necrosis factor family; Ig: immunoglobulin; IL-6: interleukin 6; LN: lupus nephritis; MDA: malondialdehyde; PC: phosphorylcholine; TGF-β: transforming growth factor β; TNF-α: transforming growth factor α.

**Supplementary Table S5. Correlations between serological markers and z-scores of the “cell cycle, mitotic phase” gene module in patients with LN**

| Serological marker             | n  | Coefficient | <i>p</i> value |
|--------------------------------|----|-------------|----------------|
| <b>anti-MDA IgM</b>            | 31 | 0.23        | 0.206          |
| <b>anti-PC IgM</b>             | 31 | 0.04        | 0.850          |
| <b>BAFF</b>                    | 28 | -0.13       | 0.525          |
| <b>IL-6</b>                    | 28 | -0.02       | 0.930          |
| <b>TGF-<math>\beta</math></b>  | 28 | -0.12       | 0.534          |
| <b>TNF-<math>\alpha</math></b> | 28 | -0.11       | 0.572          |

Spearman's rank correlation coefficients of correlations between levels of different serological markers and Z-scores of the cell cycle, mitotic phase gene module. The total number of patients with available data is indicated. Statistically significant *p* values are in bold. Only comparisons with sufficient numbers of observations ( $n \geq 10$ ) are included.

BAFF: B cell activating factor belonging to the tumour necrosis factor family; Ig: immunoglobulin; IL-6: interleukin 6; LN: lupus nephritis; MDA: malondialdehyde; PC: phosphorylcholine; TGF- $\beta$ : transforming growth factor  $\beta$ ; TNF- $\alpha$ : transforming growth factor  $\alpha$ .

**Supplementary Table S6. Correlations between serological markers and z-scores of the “CORO1A-DEF6 network” gene module in patients with LN**

| Serological marker             | n  | Coefficient | <i>p</i> value |
|--------------------------------|----|-------------|----------------|
| <b>anti-MDA IgM</b>            | 31 | 0.33        | 0.067          |
| <b>anti-PC IgM</b>             | 31 | -0.09       | 0.644          |
| <b>BAFF</b>                    | 28 | 0.16        | 0.407          |
| <b>IL-6</b>                    | 28 | 0.22        | 0.262          |
| <b>TGF-<math>\beta</math></b>  | 28 | -0.23       | 0.242          |
| <b>TNF-<math>\alpha</math></b> | 28 | 0.03        | 0.890          |

Spearman's rank correlation coefficients of correlations between levels of different serological markers and Z-scores of the CORO1A-DEF6 network gene module. The total number of patients with available data is indicated. Statistically significant *p* values are in bold. Only comparisons with sufficient numbers of observations ( $n \geq 10$ ) are included.

BAFF: B cell activating factor belonging to the tumour necrosis factor family; CORO1A-DEF6: coronin 1A-differentially expressed in FDCP 6 homolog; Ig: immunoglobulin; IL-6: interleukin 6; LN: lupus nephritis; MDA: malondialdehyde; PC: phosphorylcholine; TGF- $\beta$ : transforming growth factor  $\beta$ ; TNF- $\alpha$ : transforming growth factor  $\alpha$ .

**Supplementary Table S7. Correlations between serological markers and z-scores of the “enriched in antigen presentation (III)” gene module in patients with LN**

| Serological marker             | n  | Coefficient | <i>p</i> value |
|--------------------------------|----|-------------|----------------|
| <b>anti-MDA IgM</b>            | 31 | 0.10        | 0.575          |
| <b>anti-PC IgM</b>             | 31 | -0.13       | 0.477          |
| <b>BAFF</b>                    | 28 | 0.23        | 0.242          |
| <b>IL-6</b>                    | 28 | 0.26        | 0.177          |
| <b>TGF-<math>\beta</math></b>  | 28 | -0.02       | 0.910          |
| <b>TNF-<math>\alpha</math></b> | 28 | 0.30        | 0.115          |

Spearman's rank correlation coefficients of correlations between levels of different serological markers and Z-scores of the enriched in antigen presentation (III) gene module. The total number of patients with available data is indicated. Statistically significant *p* values are in bold. Only comparisons with sufficient numbers of observations ( $n \geq 10$ ) are included.

BAFF: B cell activating factor belonging to the tumour necrosis factor family; Ig: immunoglobulin; IL-6: interleukin 6; LN: lupus nephritis; MDA: malondialdehyde; PC: phosphorylcholine; TGF- $\beta$ : transforming growth factor  $\beta$ ; TNF- $\alpha$ : transforming growth factor  $\alpha$ .

**Supplementary Table S8. Correlations between serological markers and z-scores of the “enriched in neutrophils (II)” gene module in patients with LN**

| Serological marker  | n  | Coefficient | <i>p</i> value |
|---------------------|----|-------------|----------------|
| <b>anti-MDA IgM</b> | 31 | -0.10       | 0.588          |
| <b>anti-PC IgM</b>  | 31 | -0.30       | 0.101          |
| <b>BAFF</b>         | 28 | 0.29        | 0.139          |
| <b>IL-6</b>         | 28 | 0.08        | 0.674          |
| <b>TGF-β</b>        | 28 | 0.18        | 0.349          |
| <b>TNF-α</b>        | 28 | 0.00        | 0.996          |

Spearman's rank correlation coefficients of correlations between levels of different serological markers and Z-scores of the enriched in neutrophils (II) gene module. The total number of patients with available data is indicated. Statistically significant *p* values are in bold. Only comparisons with sufficient numbers of observations ( $n \geq 10$ ) are included.

BAFF: B cell activating factor belonging to the tumour necrosis factor family; Ig: immunoglobulin; IL-6: interleukin 6; LN: lupus nephritis; MDA: malondialdehyde; PC: phosphorylcholine; TGF-β: transforming growth factor β; TNF-α: transforming growth factor α.

**Supplementary Table S9. Correlations between serological markers and z-scores of the “erythrocytes” gene module in patients with LN**

| Serological marker  | n  | Coefficient | <i>p</i> value |
|---------------------|----|-------------|----------------|
| <b>anti-MDA IgM</b> | 31 | -0.32       | 0.082          |
| <b>anti-PC IgM</b>  | 31 | -0.22       | 0.244          |
| <b>BAFF</b>         | 28 | 0.25        | 0.192          |
| <b>IL-6</b>         | 28 | -0.06       | 0.750          |
| <b>TGF-β</b>        | 28 | -0.11       | 0.587          |
| <b>TNF-α</b>        | 28 | -0.10       | 0.600          |

Spearman's rank correlation coefficients of correlations between levels of different serological markers and Z-scores of the erythrocytes gene module. The total number of patients with available data is indicated. Statistically significant *p* values are in bold. Only comparisons with sufficient numbers of observations ( $n \geq 10$ ) are included.

BAFF: B cell activating factor belonging to the tumour necrosis factor family; Ig: immunoglobulin; IL-6: interleukin 6; LN: lupus nephritis; MDA: malondialdehyde; PC: phosphorylcholine; TGF-β: transforming growth factor β; TNF-α: transforming growth factor α.

**Supplementary Table S10. Correlations between serological markers and z-scores of the “extracellular matrix (I)” gene module in patients with LN**

| Serological marker             | n  | Coefficient | <i>p</i> value |
|--------------------------------|----|-------------|----------------|
| <b>anti-MDA IgM</b>            | 31 | 0.20        | 0.274          |
| <b>anti-PC IgM</b>             | 31 | 0.02        | 0.921          |
| <b>BAFF</b>                    | 28 | 0.01        | 0.974          |
| <b>IL-6</b>                    | 28 | -0.01       | 0.965          |
| <b>TGF-<math>\beta</math></b>  | 28 | -0.16       | 0.423          |
| <b>TNF-<math>\alpha</math></b> | 28 | 0.00        | 0.982          |

Spearman's rank correlation coefficients of correlations between levels of different serological markers and Z-scores of the extracellular matrix (I) gene module. The total number of patients with available data is indicated. Statistically significant *p* values are in bold. Only comparisons with sufficient numbers of observations ( $n \geq 10$ ) are included.

BAFF: B cell activating factor belonging to the tumour necrosis factor family; Ig: immunoglobulin; IL-6: interleukin 6; LN: lupus nephritis; MDA: malondialdehyde; PC: phosphorylcholine; TGF- $\beta$ : transforming growth factor  $\beta$ ; TNF- $\alpha$ : transforming growth factor  $\alpha$ .



**Supplementary Table S11. Correlations between serological markers and z-scores of the “extracellular region cluster” gene module in patients with LN**

| Serological marker             | n  | Coefficient | <i>p</i> value |
|--------------------------------|----|-------------|----------------|
| <b>anti-MDA IgM</b>            | 31 | 0.03        | 0.858          |
| <b>anti-PC IgM</b>             | 31 | -0.13       | 0.477          |
| <b>BAFF</b>                    | 28 | 0.16        | 0.404          |
| <b>IL-6</b>                    | 28 | 0.14        | 0.479          |
| <b>TGF-<math>\beta</math></b>  | 28 | 0.03        | 0.894          |
| <b>TNF-<math>\alpha</math></b> | 28 | 0.15        | 0.453          |

Spearman's rank correlation coefficients of correlations between levels of different serological markers and Z-scores of the extracellular region cluster gene module. The total number of patients with available data is indicated. Statistically significant *p* values are in bold. Only comparisons with sufficient numbers of observations ( $n \geq 10$ ) are included.

BAFF: B cell activating factor belonging to the tumour necrosis factor family; Ig: immunoglobulin; IL-6: interleukin 6; LN: lupus nephritis; MDA: malondialdehyde; PC: phosphorylcholine; TGF- $\beta$ : transforming growth factor  $\beta$ ; TNF- $\alpha$ : transforming growth factor  $\alpha$ .

**Supplementary Table S12. Correlations between serological markers and z-scores of the “inflammation (IV)” gene module in patients with LN**

| Serological marker             | n  | Coefficient | <i>p</i> value |
|--------------------------------|----|-------------|----------------|
| <b>anti-MDA IgM</b>            | 31 | -0.11       | 0.558          |
| <b>anti-PC IgM</b>             | 31 | 0.10        | 0.595          |
| <b>BAFF</b>                    | 28 | -0.25       | 0.201          |
| <b>IL-6</b>                    | 28 | -0.11       | 0.587          |
| <b>TGF-<math>\beta</math></b>  | 28 | 0.00        | 0.998          |
| <b>TNF-<math>\alpha</math></b> | 28 | -0.21       | 0.273          |

Spearman's rank correlation coefficients of correlations between levels of different serological markers and Z-scores of the inflammation (IV) gene module. The total number of patients with available data is indicated. Statistically significant *p* values are in bold. Only comparisons with sufficient numbers of observations ( $n \geq 10$ ) are included.

BAFF: B cell activating factor belonging to the tumour necrosis factor family; Ig: immunoglobulin; IL-6: interleukin 6; LN: lupus nephritis; MDA: malondialdehyde; PC: phosphorylcholine; TGF- $\beta$ : transforming growth factor  $\beta$ ; TNF- $\alpha$ : transforming growth factor  $\alpha$ .

**Supplementary Table S13. Correlations between serological markers and z-scores of the “inflammation (VI)” gene module in patients with LN**

| Serological marker             | n  | Coefficient | <i>p</i> value |
|--------------------------------|----|-------------|----------------|
| <b>anti-MDA IgM</b>            | 31 | 0.03        | 0.867          |
| <b>anti-PC IgM</b>             | 31 | -0.22       | 0.230          |
| <b>BAFF</b>                    | 28 | 0.26        | 0.184          |
| <b>IL-6</b>                    | 28 | 0.26        | 0.173          |
| <b>TGF-<math>\beta</math></b>  | 28 | 0.02        | 0.927          |
| <b>TNF-<math>\alpha</math></b> | 28 | 0.20        | 0.304          |

Spearman's rank correlation coefficients of correlations between levels of different serological markers and Z-scores of the inflammation (VI) gene module. The total number of patients with available data is indicated. Statistically significant *p* values are in bold. Only comparisons with sufficient numbers of observations ( $n \geq 10$ ) are included.

BAFF: B cell activating factor belonging to the tumour necrosis factor family; Ig: immunoglobulin; IL-6: interleukin 6; LN: lupus nephritis; MDA: malondialdehyde; PC: phosphorylcholine; TGF- $\beta$ : transforming growth factor  $\beta$ ; TNF- $\alpha$ : transforming growth factor  $\alpha$ .

**Supplementary Table S14. Correlations between serological markers and z-scores of the “inositol phosphate metabolism” gene module in patients with LN**

| Serological marker             | n  | Coefficient | <i>p</i> value |
|--------------------------------|----|-------------|----------------|
| <b>anti-MDA IgM</b>            | 31 | 0.08        | 0.685          |
| <b>anti-PC IgM</b>             | 31 | 0.07        | 0.692          |
| <b>BAFF</b>                    | 28 | -0.18       | 0.359          |
| <b>IL-6</b>                    | 28 | -0.05       | 0.816          |
| <b>TGF-<math>\beta</math></b>  | 28 | 0.04        | 0.853          |
| <b>TNF-<math>\alpha</math></b> | 28 | -0.21       | 0.292          |

Spearman's rank correlation coefficients of correlations between levels of different serological markers and Z-scores of the inositol phosphate metabolism gene module. The total number of patients with available data is indicated. Statistically significant *p* values are in bold. Only comparisons with sufficient numbers of observations ( $n \geq 10$ ) are included.

BAFF: B cell activating factor belonging to the tumour necrosis factor family; Ig: immunoglobulin; IL-6: interleukin 6; LN: lupus nephritis; MDA: malondialdehyde; PC: phosphorylcholine; TGF- $\beta$ : transforming growth factor  $\beta$ ; TNF- $\alpha$ : transforming growth factor  $\alpha$ .

**Supplementary Table S15. Correlations between serological markers and z-scores of the “interferon” gene module in patients with LN**

| Serological marker             | n  | Coefficient | <i>p</i> value |
|--------------------------------|----|-------------|----------------|
| <b>anti-MDA IgM</b>            | 31 | 0.12        | 0.513          |
| <b>anti-PC IgM</b>             | 31 | -0.06       | 0.742          |
| <b>BAFF</b>                    | 28 | 0.16        | 0.426          |
| <b>IL-6</b>                    | 28 | 0.26        | 0.175          |
| <b>TGF-<math>\beta</math></b>  | 28 | -0.06       | 0.771          |
| <b>TNF-<math>\alpha</math></b> | 28 | 0.32        | 0.100          |

Spearman's rank correlation coefficients of correlations between levels of different serological markers and Z-scores of the interferon gene module. The total number of patients with available data is indicated. Statistically significant *p* values are in bold. Only comparisons with sufficient numbers of observations ( $n \geq 10$ ) are included.

BAFF: B cell activating factor belonging to the tumour necrosis factor family; Ig: immunoglobulin; IL-6: interleukin 6; LN: lupus nephritis; MDA: malondialdehyde; PC: phosphorylcholine; TGF- $\beta$ : transforming growth factor  $\beta$ ; TNF- $\alpha$ : transforming growth factor  $\alpha$ .

**Supplementary Table S16. Correlations between serological markers and z-scores of the “interferon (II)” gene module in patients with LN**

| Serological marker             | n  | Coefficient | <i>p</i> value |
|--------------------------------|----|-------------|----------------|
| <b>anti-MDA IgM</b>            | 31 | 0.06        | 0.768          |
| <b>anti-PC IgM</b>             | 31 | -0.20       | 0.287          |
| <b>BAFF</b>                    | 28 | 0.26        | 0.180          |
| <b>IL-6</b>                    | 28 | 0.36        | 0.063          |
| <b>TGF-<math>\beta</math></b>  | 28 | 0.00        | 0.993          |
| <b>TNF-<math>\alpha</math></b> | 28 | 0.41        | 0.033          |

Spearman's rank correlation coefficients of correlations between levels of different serological markers and Z-scores of the interferon (II) gene module. The total number of patients with available data is indicated. Statistically significant *p* values are in bold. Only comparisons with sufficient numbers of observations ( $n \geq 10$ ) are included.

BAFF: B cell activating factor belonging to the tumour necrosis factor family; Ig: immunoglobulin; IL-6: interleukin 6; LN: lupus nephritis; MDA: malondialdehyde; PC: phosphorylcholine; TGF- $\beta$ : transforming growth factor  $\beta$ ; TNF- $\alpha$ : transforming growth factor  $\alpha$ .

**Supplementary Table S17. Correlations between serological markers and z-scores of the “MAPK, RAS signalling” gene module in patients with LN**

| Serological marker  | n  | Coefficient | <i>p</i> value |
|---------------------|----|-------------|----------------|
| <b>anti-MDA IgM</b> | 31 | -0.14       | 0.440          |
| <b>anti-PC IgM</b>  | 31 | -0.16       | 0.388          |
| <b>BAFF</b>         | 28 | 0.25        | 0.191          |
| <b>IL-6</b>         | 28 | 0.00        | 0.987          |
| <b>TGF-β</b>        | 28 | 0.20        | 0.301          |
| <b>TNF-α</b>        | 28 | 0.02        | 0.910          |

Spearman's rank correlation coefficients of correlations between levels of different serological markers and Z-scores of the MAPK, RAS signalling gene module. The total number of patients with available data is indicated. Statistically significant *p* values are in bold. Only comparisons with sufficient numbers of observations ( $n \geq 10$ ) are included.

BAFF: B cell activating factor belonging to the tumour necrosis factor family; Ig: immunoglobulin; IL-6: interleukin 6; LN: lupus nephritis; MAPK: mitogen-activated protein kinase; MDA: malondialdehyde; PC: phosphorylcholine; TGF-β: transforming growth factor β; TNF-α: transforming growth factor α.

**Supplementary Table S18. Correlations between serological markers and z-scores of the “monocytes” gene module in patients with LN**

| Serological marker | n  | Coefficient | <i>p</i> value |
|--------------------|----|-------------|----------------|
| anti-MDA IgM       | 31 | 0.07        | 0.712          |
| anti-PC IgM        | 31 | -0.12       | 0.532          |
| BAFF               | 28 | 0.14        | 0.480          |
| IL-6               | 28 | 0.42        | <b>0.028</b>   |
| TGF- $\beta$       | 28 | 0.07        | 0.715          |
| TNF- $\alpha$      | 28 | 0.38        | 0.047          |

Spearman's rank correlation coefficients of correlations between levels of different serological markers and Z-scores of the monocytes gene module. The total number of patients with available data is indicated. Statistically significant *p* values are in bold. Only comparisons with sufficient numbers of observations ( $n \geq 10$ ) are included.

BAFF: B cell activating factor belonging to the tumour necrosis factor family; Ig: immunoglobulin; IL-6: interleukin 6; LN: lupus nephritis; MDA: malondialdehyde; PC: phosphorylcholine; TGF- $\beta$ : transforming growth factor  $\beta$ ; TNF- $\alpha$ : transforming growth factor  $\alpha$ .



**Supplementary Table S19. Correlations between serological markers and z-scores of the “plasma cells, immunoglobulins” gene module in patients with LN**

| Serological marker             | n  | Coefficient | <i>p</i> value |
|--------------------------------|----|-------------|----------------|
| <b>anti-MDA IgM</b>            | 31 | 0.14        | 0.461          |
| <b>anti-PC IgM</b>             | 31 | -0.09       | 0.635          |
| <b>BAFF</b>                    | 28 | 0.14        | 0.470          |
| <b>IL-6</b>                    | 28 | 0.39        | 0.039          |
| <b>TGF-<math>\beta</math></b>  | 28 | -0.06       | 0.765          |
| <b>TNF-<math>\alpha</math></b> | 28 | 0.39        | 0.041          |

Spearman's rank correlation coefficients of correlations between levels of different serological markers and Z-scores of the plasma cells, immunoglobulins gene module. The total number of patients with available data is indicated. Statistically significant *p* values are in bold. Only comparisons with sufficient numbers of observations ( $n \geq 10$ ) are included.

BAFF: B cell activating factor belonging to the tumour necrosis factor family; Ig: immunoglobulin; IL-6: interleukin 6; LN: lupus nephritis; MDA: malondialdehyde; PC: phosphorylcholine; TGF- $\beta$ : transforming growth factor  $\beta$ ; TNF- $\alpha$ : transforming growth factor  $\alpha$ .

**Supplementary Table S20. Correlations between serological markers and z-scores of the “platelets” gene module in patients with LN**

| Serological marker             | n  | Coefficient | p value      |
|--------------------------------|----|-------------|--------------|
| <b>anti-MDA IgM</b>            | 31 | -0.51       | <b>0.003</b> |
| <b>anti-PC IgM</b>             | 31 | -0.42       | <b>0.019</b> |
| <b>BAFF</b>                    | 28 | 0.29        | 0.128        |
| <b>IL-6</b>                    | 28 | -0.02       | 0.916        |
| <b>TGF-<math>\beta</math></b>  | 28 | 0.14        | 0.491        |
| <b>TNF-<math>\alpha</math></b> | 28 | -0.05       | 0.791        |

Spearman's rank correlation coefficients of correlations between levels of different serological markers and Z-scores of the platelets gene module. The total number of patients with available data is indicated. Statistically significant *p* values are in bold. Only comparisons with sufficient numbers of observations ( $n \geq 10$ ) are included.

BAFF: B cell activating factor belonging to the tumour necrosis factor family; Ig: immunoglobulin; IL-6: interleukin 6; LN: lupus nephritis; MDA: malondialdehyde; PC: phosphorylcholine; TGF- $\beta$ : transforming growth factor  $\beta$ ; TNF- $\alpha$ : transforming growth factor  $\alpha$ .

**Supplementary Table S21. Correlations between serological markers and z-scores of the “protein synthesis (I)” gene module in patients with LN**

| Serological marker             | n  | Coefficient | <i>p</i> value |
|--------------------------------|----|-------------|----------------|
| <b>anti-MDA IgM</b>            | 31 | 0.16        | 0.380          |
| <b>anti-PC IgM</b>             | 31 | 0.03        | 0.865          |
| <b>BAFF</b>                    | 28 | 0.08        | 0.692          |
| <b>IL-6</b>                    | 28 | 0.23        | 0.235          |
| <b>TGF-<math>\beta</math></b>  | 28 | -0.12       | 0.553          |
| <b>TNF-<math>\alpha</math></b> | 28 | 0.18        | 0.370          |

Spearman's rank correlation coefficients of correlations between levels of different serological markers and Z-scores of the protein synthesis (I) gene module. The total number of patients with available data is indicated. Statistically significant *p* values are in bold. Only comparisons with sufficient numbers of observations ( $n \geq 10$ ) are included.

BAFF: B cell activating factor belonging to the tumour necrosis factor family; Ig: immunoglobulin; IL-6: interleukin 6; LN: lupus nephritis; MDA: malondialdehyde; PC: phosphorylcholine; TGF- $\beta$ : transforming growth factor  $\beta$ ; TNF- $\alpha$ : transforming growth factor  $\alpha$ .

**Supplementary Table S22. Correlations between serological markers and z-scores of the “regulation of antigen presentation and immune response” gene module in patients with LN**

| Serological marker  | n  | Coefficient | <i>p</i> value |
|---------------------|----|-------------|----------------|
| <b>anti-MDA IgM</b> | 31 | 0.18        | 0.337          |
| <b>anti-PC IgM</b>  | 31 | -0.01       | 0.973          |
| <b>BAFF</b>         | 28 | 0.05        | 0.816          |
| <b>IL-6</b>         | 28 | 0.13        | 0.500          |
| <b>TGF-β</b>        | 28 | -0.18       | 0.362          |
| <b>TNF-α</b>        | 28 | 0.14        | 0.484          |

Spearman's rank correlation coefficients of correlations between levels of different serological markers and Z-scores of the regulation of antigen presentation and immune response gene module. The total number of patients with available data is indicated. Statistically significant *p* values are in bold. Only comparisons with sufficient numbers of observations ( $n \geq 10$ ) are included.

BAFF: B cell activating factor belonging to the tumour necrosis factor family; Ig: immunoglobulin; IL-6: interleukin 6; LN: lupus nephritis; MDA: malondialdehyde; PC: phosphorylcholine; TGF-β: transforming growth factor β; TNF-α: transforming growth factor α.

**Supplementary Table S23. Correlations between serological markers and z-scores of the “regulation of transcription, transcription factors” gene module in patients with LN**

| Serological marker             | n  | Coefficient | <i>p</i> value |
|--------------------------------|----|-------------|----------------|
| <b>anti-MDA IgM</b>            | 31 | 0.21        | 0.249          |
| <b>anti-PC IgM</b>             | 31 | 0.17        | 0.355          |
| <b>BAFF</b>                    | 28 | -0.16       | 0.413          |
| <b>IL-6</b>                    | 28 | -0.17       | 0.377          |
| <b>TGF-<math>\beta</math></b>  | 28 | -0.13       | 0.503          |
| <b>TNF-<math>\alpha</math></b> | 28 | -0.29       | 0.130          |

Spearman's rank correlation coefficients of correlations between levels of different serological markers and Z-scores of the regulation of transcription, transcription factors gene module. The total number of patients with available data is indicated. Statistically significant *p* values are in bold. Only comparisons with sufficient numbers of observations ( $n \geq 10$ ) are included.

BAFF: B cell activating factor belonging to the tumour necrosis factor family; Ig: immunoglobulin; IL-6: interleukin 6; LN: lupus nephritis; MDA: malondialdehyde; PC: phosphorylcholine; TGF- $\beta$ : transforming growth factor  $\beta$ ; TNF- $\alpha$ : transforming growth factor  $\alpha$ .

**Supplementary Table S24. Z-scores of replicated gene modules in patients with LN and anti- $\beta$ GPI IgG positivity versus negative patients**

| Gene module                                                   | anti- $\beta$ GPI IgG (+)<br>N=5 | anti- $\beta$ GPI IgG (-)<br>N=26 | <i>p</i> value |
|---------------------------------------------------------------|----------------------------------|-----------------------------------|----------------|
| <b>B cell</b>                                                 | -1.54 (-2.61--1.48)              | -1.47 (-2.30--0.32)               | 0.707          |
| <b>Cell cycle, mitotic phase</b>                              | -0.23 (-0.86--0.06)              | -0.41 (-0.86--0.12)               | 0.788          |
| <b>CORO1A-DEF6 network</b>                                    | -0.35 (-0.37--0.06)              | -0.07 (-0.18--0.02)               | 0.119          |
| <b>Enriched in antigen presentation (III)</b>                 | -0.37 (-0.59--0.17)              | -0.39 (-0.53--0.03)               | 0.452          |
| <b>Enriched in neutrophils (II)</b>                           | 0.17 (-0.14--0.21)               | 0.06 (-0.08--0.18)                | 0.872          |
| <b>Erythrocytes</b>                                           | -0.23 (-0.30--0.19)              | 0.23 (-0.44--0.67)                | 0.707          |
| <b>Extracellular matrix (I)</b>                               | -1.42 (-1.43--1.15)              | -0.74 (-1.12--0.35)               | 0.060          |
| <b>Extracellular region cluster</b>                           | -0.28 (-0.42--0.01)              | -0.08 (-0.23--0.03)               | 0.259          |
| <b>Inflammation (IV)</b>                                      | 0.25 (-0.11--0.49)               | 0.24 (-0.01--0.44)                | 0.872          |
| <b>Inflammation (VI)</b>                                      | 0.08 (-0.50--0.34)               | 0.01 (-0.25--0.20)                | 1.000          |
| <b>Inositol phosphate metabolism</b>                          | -0.13 (-0.55--0.68)              | -0.05 (-0.38--0.26)               | 0.830          |
| <b>Interferon</b>                                             | 0.76 (0.03--1.71)                | 1.41 (0.05--2.02)                 | 0.830          |
| <b>Interferon (II)</b>                                        | 0.23 (-0.27--0.93)               | 0.53 (0.24--0.70)                 | 0.591          |
| <b>MAPK-RAS signalling</b>                                    | 0.29 (-0.65--0.35)               | -0.01 (-0.43--0.33)               | 0.957          |
| <b>Monocytes</b>                                              | 0.38 (0.26--0.86)                | 0.26 (-0.15--0.92)                | 0.390          |
| <b>Plasma cells, immunoglobulins</b>                          | 0.04 (-0.24--1.06)               | -0.16 (-0.70--0.56)               | 0.452          |
| <b>Platelets</b>                                              | -0.03 (-0.62--0.23)              | 0.13 (-0.35--0.65)                | 0.452          |
| <b>Protein synthesis (I)</b>                                  | -0.78 (-1.17--0.29)              | -0.35 (-0.91--0.13)               | 0.667          |
| <b>Regulation of antigen presentation and immune response</b> | -1.41 (-1.43--0.86)              | -0.73 (-1.26--0.22)               | 0.334          |
| <b>Regulation of transcription, transcription factors</b>     | -0.82 (-0.92--0.17)              | -0.45 (-0.81--0.10)               | 0.629          |

Data are presented as median (interquartile range). The total number of patients with available data is indicated. All *p* values are derived from non-parametrical Mann-Whitney *U* tests. Statistically significant *p* values are in bold.

$\beta$ GPI:  $\beta_2$  glycoprotein I; CORO1A-DEF6: coronin 1A-differentially expressed in FDCP 6 homolog; Ig: immunoglobulin; LN: lupus nephritis; MAPK: mitogen-activated protein kinase.

**Supplementary Table S25. Z-scores of replicated gene modules in patients with LN and aCL IgG positivity versus negative patients**

| Gene module                                                   | aCL IgG (+)<br>N=4  | aCL IgG (-)<br>N=27 | <i>p</i> value |
|---------------------------------------------------------------|---------------------|---------------------|----------------|
| <b>B cell</b>                                                 | -1.51 (-1.97--1.05) | -1.71 (-2.36--0.43) | 0.906          |
| <b>Cell cycle, mitotic phase</b>                              | -0.15 (-0.56--0.16) | -0.43 (-0.87--0.13) | 0.480          |
| <b>CORO1A-DEF6 network</b>                                    | -0.21 (-0.45--0.04) | -0.09 (-0.20--0.02) | 0.289          |
| <b>Enriched in antigen presentation (III)</b>                 | -0.48 (-0.88--0.32) | -0.37 (-0.51--0.03) | 0.289          |
| <b>Enriched in neutrophils (II)</b>                           | 0.02 (-0.25--0.19)  | 0.08 (-0.07--0.18)  | 0.680          |
| <b>Erythrocytes</b>                                           | -0.02 (-0.25--0.41) | 0.21 (-0.49--0.65)  | 0.953          |
| <b>Extracellular matrix (I)</b>                               | -1.28 (-1.61--0.97) | -0.74 (-1.15--0.36) | 0.157          |
| <b>Extracellular region cluster</b>                           | -0.20 (-0.47--0.03) | -0.08 (-0.25--0.02) | 0.480          |
| <b>Inflammation (IV)</b>                                      | 0.37 (0.16--0.70)   | 0.18 (-0.07--0.43)  | 0.377          |
| <b>Inflammation (VI)</b>                                      | -0.21 (-0.66--0.17) | 0.02 (-0.24--0.22)  | 0.517          |
| <b>Inositol phosphate metabolism</b>                          | 0.28 (-0.23--0.78)  | -0.07 (-0.39--0.25) | 0.377          |
| <b>Interferon</b>                                             | 0.39 (-0.01--0.99)  | 1.49 (0.05--2.12)   | 0.289          |
| <b>Interferon (II)</b>                                        | -0.02 (-0.29--0.41) | 0.54 (0.24--0.73)   | 0.157          |
| <b>MAPK-RAS signalling</b>                                    | -0.15 (-0.78--0.40) | 0.02 (-0.41--0.33)  | 0.768          |
| <b>Monocytes</b>                                              | 0.32 (0.10--0.75)   | 0.26 (-0.10--0.92)  | 0.596          |
| <b>Plasma cells, immunoglobulins</b>                          | -0.10 (-0.38--0.29) | -0.10 (-0.67--0.65) | 0.953          |
| <b>Platelets</b>                                              | 0.10 (-0.18--0.42)  | 0.01 (-0.37--0.63)  | 0.953          |
| <b>Protein synthesis (I)</b>                                  | -0.24 (-0.90--0.32) | -0.44 (-0.93--0.10) | 0.860          |
| <b>Regulation of antigen presentation and immune response</b> | -1.14 (-1.61--0.63) | -0.80 (-1.35--0.25) | 0.517          |
| <b>Regulation of transcription, transcription factors</b>     | -0.50 (-0.85--0.07) | -0.46 (-0.91--0.13) | 0.724          |

Data are presented as median (interquartile range). The total number of patients with available data is indicated. All *p* values are derived from non-parametrical Mann-Whitney *U* tests. Statistically significant *p* values are in bold.

aCL: anti-cardiolipin; CORO1A-DEF6: coronin 1A- differentially expressed in FDCP 6 homolog; Ig: immunoglobulin; LN: lupus nephritis; MAPK: mitogen-activated protein kinase.

**Supplementary Table S26. Z-scores of replicated gene modules in patients with LN and low versus normal/high levels of C3c**

| Gene module                                                   | Low C3c<br>N=10     | Normal/high C3c<br>N=21 | <i>p</i> value |
|---------------------------------------------------------------|---------------------|-------------------------|----------------|
| <b>B cell</b>                                                 | -1.03 (-2.54–-0.32) | -1.71 (-2.20–-0.68)     | 0.642          |
| <b>Cell cycle, mitotic phase</b>                              | -0.47 (-0.88–0.38)  | -0.32 (-0.76–-0.12)     | 0.899          |
| <b>CORO1A-DEF6 network</b>                                    | -0.07 (-0.18–0.10)  | -0.12 (-0.28–0.00)      | 0.422          |
| <b>Enriched in antigen presentation (III)</b>                 | -0.06 (-0.32–0.17)  | -0.43 (-0.59–-0.24)     | <b>0.031</b>   |
| <b>Enriched in neutrophils (II)</b>                           | 0.17 (0.08–0.20)    | -0.03 (-0.14–0.14)      | <b>0.010</b>   |
| <b>Erythrocytes</b>                                           | -0.24 (-0.50–-0.16) | 0.33 (-0.23–0.72)       | 0.083          |
| <b>Extracellular matrix (I)</b>                               | -0.52 (-0.79–-0.13) | -1.00 (-1.26–-0.58)     | 0.083          |
| <b>Extracellular region cluster</b>                           | -0.01 (-0.12–0.13)  | -0.10 (-0.27–-0.02)     | 0.099          |
| <b>Inflammation (IV)</b>                                      | -0.12 (-0.34–0.17)  | 0.33 (0.07–0.50)        | <b>0.022</b>   |
| <b>Inflammation (VI)</b>                                      | 0.23 (0.06–0.36)    | -0.19 (-0.30–0.11)      | <b>0.004</b>   |
| <b>Inositol phosphate metabolism</b>                          | -0.25 (-0.57–0.36)  | -0.03 (-0.28–0.28)      | 0.375          |
| <b>Interferon</b>                                             | 1.73 (0.37–2.26)    | 0.76 (-0.06–1.74)       | 0.099          |
| <b>Interferon (II)</b>                                        | 0.73 (0.38–0.98)    | 0.44 (-0.09–0.60)       | <b>0.025</b>   |
| <b>MAPK–RAS signalling</b>                                    | 0.29 (-0.13–0.33)   | -0.35 (-0.68–0.36)      | 0.151          |
| <b>Monocytes</b>                                              | 0.56 (0.11–1.06)    | 0.26 (-0.46–0.44)       | 0.353          |
| <b>Plasma cells, immunoglobulins</b>                          | 0.39 (-0.32–0.81)   | -0.23 (-0.81–0.39)      | 0.205          |
| <b>Platelets</b>                                              | -0.21 (-0.50–0.19)  | 0.25 (-0.24–0.68)       | 0.083          |
| <b>Protein synthesis (I)</b>                                  | -0.73 (-1.07–0.11)  | -0.18 (-0.90–0.16)      | 0.526          |
| <b>Regulation of antigen presentation and immune response</b> | -0.99 (-1.16–-0.14) | -0.80 (-1.62–-0.29)     | 0.583          |
| <b>Regulation of transcription, transcription factors</b>     | -0.47 (-0.96–-0.09) | -0.46 (-0.82–-0.20)     | 0.833          |

Data are presented as median (interquartile range). The total number of patients with available data is indicated. All *p* values are derived from non-parametrical Mann-Whitney *U* tests. Statistically significant *p* values are in bold.

C3c: complement component 3c; CORO1A-DEF6: coronin 1A- differentially expressed in FDCP 6 homolog; Ig: immunoglobulin; LN: lupus nephritis; MAPK: mitogen-activated protein kinase.



**Supplementary Table S27. Z-scores of replicated gene modules in patients with LN and low versus normal/high levels of C4**

| Gene module                                                   | Low C4<br>N=9       | Normal/high C4<br>N=22 | <i>p</i> value |
|---------------------------------------------------------------|---------------------|------------------------|----------------|
| <b>B cell</b>                                                 | -1.22 (-2.20–-0.91) | -1.76 (-2.55–-0.15)    | 0.761          |
| <b>Cell cycle, mitotic phase</b>                              | -0.26 (-0.48–-0.06) | -0.44 (-0.98–-0.15)    | 0.240          |
| <b>CORO1A-DEF6 network</b>                                    | -0.01 (-0.17–0.07)  | -0.11 (-0.29–0.00)     | 0.277          |
| <b>Enriched in antigen presentation (III)</b>                 | -0.15 (-0.86–0.17)  | -0.39 (-0.53–-0.15)    | 0.663          |
| <b>Enriched in neutrophils (II)</b>                           | 0.09 (0.00–0.19)    | 0.04 (-0.12–0.18)      | 0.572          |
| <b>Erythrocytes</b>                                           | -0.15 (-0.30–0.29)  | 0.20 (-0.42–0.71)      | 0.408          |
| <b>Extracellular matrix (I)</b>                               | -0.55 (-0.85–-0.23) | -0.97 (-1.37–-0.51)    | 0.164          |
| <b>Extracellular region cluster</b>                           | -0.08 (-0.14–0.03)  | -0.09 (-0.28–0.02)     | 0.542          |
| <b>Inflammation (IV)</b>                                      | 0.34 (-0.14–0.40)   | 0.21 (-0.01–0.48)      | 0.728          |
| <b>Inflammation (VI)</b>                                      | 0.11 (0.01–0.36)    | -0.04 (-0.27–0.18)     | 0.164          |
| <b>Inositol phosphate metabolism</b>                          | 0.05 (-0.36–0.45)   | -0.08 (-0.40–0.19)     | 0.408          |
| <b>Interferon</b>                                             | 1.71 (0.76–2.10)    | 0.88 (0.00–1.78)       | 0.408          |
| <b>Interferon (II)</b>                                        | 0.60 (0.12–0.70)    | 0.45 (0.23–0.73)       | 0.632          |
| <b>MAPK–RAS signalling</b>                                    | -0.26 (-0.46–0.16)  | 0.16 (-0.47–0.37)      | 0.177          |
| <b>Monocytes</b>                                              | 0.29 (0.25–1.09)    | 0.23 (-0.44–0.66)      | 0.240          |
| <b>Plasma cells, immunoglobulins</b>                          | 0.16 (-0.34–0.78)   | -0.23 (-0.76–0.41)     | 0.317          |
| <b>Platelets</b>                                              | -0.18 (-0.53–0.28)  | 0.12 (-0.32–0.65)      | 0.486          |
| <b>Protein synthesis (I)</b>                                  | -0.18 (-0.46–0.31)  | -0.55 (-1.00–0.03)     | 0.139          |
| <b>Regulation of antigen presentation and immune response</b> | -0.85 (-1.15–0.02)  | -0.83 (-1.65–-0.33)    | 0.296          |
| <b>Regulation of transcription, transcription factors</b>     | 0.17 (-0.67–0.22)   | -0.56 (-0.95–-0.35)    | 0.033          |

Data are presented as median (interquartile range). The total number of patients with available data is indicated. All *p* values are derived from non-parametrical Mann-Whitney *U* tests. Statistically significant *p* values are in bold.

C4: complement component 4; CORO1A-DEF6: coronin 1A- differentially expressed in FDCP 6 homolog; Ig: immunoglobulin; LN: lupus nephritis; MAPK: mitogen-activated protein kinase.

**Supplementary Table S28. Z-scores of replicated gene modules in patients with LN and anti-chromatin positivity versus negative patients**

| Gene module                                                   | Anti-chromatin (+)<br>N=8 | Anti-chromatin (-)<br>N=22 | <i>p</i> value |
|---------------------------------------------------------------|---------------------------|----------------------------|----------------|
| <b>B cell</b>                                                 | -1.76 (-2.54--0.71)       | -1.35 (-2.37--0.32)        | 0.743          |
| <b>Cell cycle, mitotic phase</b>                              | -0.24 (-1.05--0.06)       | -0.46 (-0.84--0.15)        | 0.963          |
| <b>CORO1A-DEF6 network</b>                                    | 0.00 (-0.20--0.01)        | -0.11 (-0.22--0.01)        | 0.574          |
| <b>Enriched in antigen presentation (III)</b>                 | -0.43 (-0.54--0.17)       | -0.39 (-0.55--0.03)        | 0.851          |
| <b>Enriched in neutrophils (II)</b>                           | -0.07 (-0.15--0.16)       | 0.09 (0.01--0.18)          | 0.373          |
| <b>Erythrocytes</b>                                           | 0.62 (-0.28--0.80)        | 0.02 (-0.43--0.52)         | 0.260          |
| <b>Extracellular matrix (I)</b>                               | -0.83 (-1.07--0.64)       | -0.69 (-1.35--0.40)        | 0.815          |
| <b>Extracellular region cluster</b>                           | -0.10 (-0.26--0.01)       | -0.09 (-0.28--0.02)        | 0.925          |
| <b>Inflammation (IV)</b>                                      | 0.11 (0.00--0.30)         | 0.27 (-0.13--0.49)         | 0.511          |
| <b>Inflammation (VI)</b>                                      | -0.16 (-0.27--0.01)       | 0.07 (-0.17--0.25)         | 0.205          |
| <b>Inositol phosphate metabolism</b>                          | -0.17 (-0.39--0.16)       | -0.06 (-0.39--0.39)        | 0.673          |
| <b>Interferon</b>                                             | 0.88 (0.13--1.57)         | 1.70 (0.05--2.13)          | 0.606          |
| <b>Interferon (II)</b>                                        | 0.41 (0.24--0.60)         | 0.57 (0.16--0.82)          | 0.511          |
| <b>MAPK-RAS signalling</b>                                    | -0.02 (-0.64--0.41)       | 0.02 (-0.33--0.33)         | 0.925          |
| <b>Monocytes</b>                                              | 0.23 (-0.47--0.62)        | 0.28 (0.01--0.83)          | 0.851          |
| <b>Plasma cells, immunoglobulins</b>                          | -0.49 (-0.93--0.02)       | 0.10 (-0.55--0.76)         | 0.133          |
| <b>Platelets</b>                                              | 0.11 (-0.26--0.40)        | -0.01 (-0.50--0.65)        | 0.606          |
| <b>Protein synthesis (I)</b>                                  | -0.35 (-0.93--0.09)       | -0.45 (-0.93--0.17)        | 0.888          |
| <b>Regulation of antigen presentation and immune response</b> | -0.64 (-1.37--0.38)       | -0.96 (-1.42--0.37)        | 0.778          |
| <b>Regulation of transcription, transcription factors</b>     | -0.45 (-0.73--0.34)       | -0.43 (-0.84--0.07)        | 0.673          |

Data are presented as median (interquartile range). The total number of patients with available data is indicated. All *p* values are derived from non-parametrical Mann-Whitney *U* tests. Statistically significant *p* values are in bold.

CORO1A-DEF6: coronin 1A- differentially expressed in FDCP 6 homolog; Ig: immunoglobulin; LN: lupus nephritis; MAPK: mitogen-activated protein kinase.

**Supplementary Table S29. Z-scores of replicated gene modules in patients with LN and anti-dsDNA positivity versus negative patients**

| Gene module                                                   | anti-dsDNA (+)<br>N=18 | anti-dsDNA (-)<br>N=13 | <i>p</i> value |
|---------------------------------------------------------------|------------------------|------------------------|----------------|
| <b>B cell</b>                                                 | -1.03 (-2.30–-0.05)    | -1.81 (-3.26–-1.48)    | 0.161          |
| <b>Cell cycle, mitotic phase</b>                              | -0.41 (-0.69–-0.12)    | -0.32 (-1.16–-0.06)    | 0.471          |
| <b>CORO1A-DEF6 network</b>                                    | -0.05 (-0.18–0.03)     | -0.13 (-0.30–0.00)     | 0.401          |
| <b>Enriched in antigen presentation (III)</b>                 | -0.16 (-0.45–0.14)     | -0.44 (-0.56–-0.28)    | 0.093          |
| <b>Enriched in neutrophils (II)</b>                           | 0.09 (0.02–0.18)       | -0.05 (-0.14–0.18)     | 0.337          |
| <b>Erythrocytes</b>                                           | -0.16 (-0.50–0.32)     | 0.57 (-0.23–0.79)      | 0.139          |
| <b>Extracellular matrix (I)</b>                               | -0.52 (-1.12–-0.25)    | -1.00 (-1.26–-0.74)    | 0.078          |
| <b>Extracellular region cluster</b>                           | -0.05 (-0.15–0.03)     | -0.14 (-0.40–-0.02)    | 0.186          |
| <b>Inflammation (IV)</b>                                      | 0.24 (-0.18–0.44)      | 0.25 (0.06–0.49)       | 0.575          |
| <b>Inflammation (VI)</b>                                      | 0.07 (0.00–0.24)       | -0.25 (-0.30–0.20)     | 0.078          |
| <b>Inositol phosphate metabolism</b>                          | -0.03 (-0.34–0.39)     | -0.07 (-0.40–0.21)     | 0.936          |
| <b>Interferon</b>                                             | 1.72 (0.05–2.22)       | 0.76 (-0.01–1.69)      | 0.246          |
| <b>Interferon (II)</b>                                        | 0.62 (0.23–0.82)       | 0.44 (0.13–0.60)       | 0.186          |
| <b>MAPK–RAS signalling</b>                                    | 0.09 (-0.28–0.33)      | -0.37 (-0.68–0.37)     | 0.423          |
| <b>Monocytes</b>                                              | 0.34 (0.04–0.95)       | 0.26 (-0.49–0.44)      | 0.471          |
| <b>Plasma cells, immunoglobulins</b>                          | 0.03 (-0.49–0.74)      | -0.37 (-0.91–0.42)     | 0.262          |
| <b>Platelets</b>                                              | -0.10 (-0.39–0.51)     | 0.25 (-0.24–0.67)      | 0.378          |
| <b>Protein synthesis (I)</b>                                  | -0.45 (-0.88–0.11)     | -0.13 (-1.03–0.17)     | 0.936          |
| <b>Regulation of antigen presentation and immune response</b> | -0.85 (-1.16–-0.08)    | -0.80 (-1.62–-0.44)    | 0.471          |
| <b>Regulation of transcription, transcription factors</b>     | -0.51 (-0.93–0.07)     | -0.46 (-0.82–-0.35)    | 0.779          |

Data are presented as median (interquartile range). The total number of patients with available data is indicated. All *p* values are derived from non-parametrical Mann-Whitney *U* tests. Statistically significant *p* values are in bold.

CORO1A-DEF6: coronin 1A- differentially expressed in FDCP 6 homolog; Ig: immunoglobulin; LN: lupus nephritis; MAPK: mitogen-activated protein kinase.

**Supplementary Table S30. Z-scores of replicated gene modules in patients with LN and anti-SSA-52 positivity versus negative patients**

| Gene module                                                   | anti-SSA-52 (+)<br>N=5 | anti-SSA-52 (-)<br>N=19 | <i>p</i> value |
|---------------------------------------------------------------|------------------------|-------------------------|----------------|
| <b>B cell</b>                                                 | -2.33 (-3.17--1.22)    | -1.48 (-2.06--0.43)     | 0.303          |
| <b>Cell cycle, mitotic phase</b>                              | -0.76 (-1.15--0.51)    | -0.32 (-0.87--0.05)     | 0.126          |
| <b>CORO1A-DEF6 network</b>                                    | -0.13 (-0.17--0.12)    | -0.04 (-0.34--0.03)     | 0.546          |
| <b>Enriched in antigen presentation (III)</b>                 | -0.45 (-0.59--0.44)    | -0.28 (-0.55--0.03)     | 0.374          |
| <b>Enriched in neutrophils (II)</b>                           | 0.08 (0.00--0.23)      | 0.09 (-0.10--0.18)      | 0.696          |
| <b>Erythrocytes</b>                                           | 0.19 (-0.15--0.80)     | -0.17 (-0.49--0.48)     | 0.271          |
| <b>Extracellular matrix (I)</b>                               | -0.85 (-1.15--0.58)    | -0.74 (-1.21--0.36)     | 0.499          |
| <b>Extracellular region cluster</b>                           | -0.15 (-0.42--0.08)    | -0.09 (-0.27--0.06)     | 0.241          |
| <b>Inflammation (IV)</b>                                      | 0.25 (-0.14--0.50)     | 0.12 (-0.06--0.36)      | 0.749          |
| <b>Inflammation (VI)</b>                                      | 0.25 (-0.22--0.36)     | 0.02 (-0.22--0.15)      | 0.414          |
| <b>Inositol phosphate metabolism</b>                          | -0.39 (-0.55--0.03)    | -0.10 (-0.38--0.44)     | 0.271          |
| <b>Interferon</b>                                             | 1.71 (1.33--2.10)      | 0.58 (0.01--1.73)       | 0.271          |
| <b>Interferon (II)</b>                                        | 0.70 (0.54--0.93)      | 0.28 (0.02--0.66)       | 0.166          |
| <b>MAPK-RAS signalling</b>                                    | 0.16 (0.03--0.28)      | -0.22 (-0.66--0.35)     | 0.696          |
| <b>Monocytes</b>                                              | 0.25 (-0.20--0.38)     | 0.26 (0.02--0.92)       | 0.546          |
| <b>Plasma cells, immunoglobulins</b>                          | -0.34 (-0.73--0.61)    | -0.10 (-0.58--0.80)     | 0.644          |
| <b>Platelets</b>                                              | 0.28 (0.23--0.67)      | -0.18 (-0.46--0.25)     | 0.145          |
| <b>Protein synthesis (I)</b>                                  | -0.68 (-1.12--0.18)    | -0.44 (-0.91--0.23)     | 0.303          |
| <b>Regulation of antigen presentation and immune response</b> | -1.15 (-1.17--1.06)    | -0.80 (-1.35--0.04)     | 0.214          |
| <b>Regulation of transcription, transcription factors</b>     | -0.35 (-0.82--0.26)    | -0.44 (-0.96--0.11)     | 0.915          |

Data are presented as median (interquartile range). The total number of patients with available data is indicated. All *p* values are derived from non-parametrical Mann-Whitney *U* tests. Statistically significant *p* values are in bold.

CORO1A-DEF6: coronin 1A- differentially expressed in FDCP 6 homolog; Ig: immunoglobulin; LN: lupus nephritis; MAPK: mitogen-activated protein kinase.

**Supplementary Table S31. Z-scores of replicated gene modules in patients with LN and anti-SSA-60 positivity versus negative patients**

| Gene module                                                   | anti-SSA-60 (+)<br>N=5 | anti-SSA-60 (-)<br>N=19 | <i>p</i> value |
|---------------------------------------------------------------|------------------------|-------------------------|----------------|
| <b>B cell</b>                                                 | -2.33 (-3.17--1.54)    | -1.16 (-2.06--0.10)     | 0.095          |
| <b>Cell cycle, mitotic phase</b>                              | -0.51 (-1.15--0.26)    | -0.43 (-0.87, -0.09)    | 0.594          |
| <b>CORO1A-DEF6 network</b>                                    | -0.17 (-0.18--0.13)    | -0.04 (-0.23--0.03)     | 0.241          |
| <b>Enriched in antigen presentation (III)</b>                 | -0.45 (-0.59--0.14)    | -0.37 (-0.55--0.03)     | 0.644          |
| <b>Enriched in neutrophils (II)</b>                           | 0.08 (0.00--0.23)      | 0.09 (-0.10--0.18)      | 0.644          |
| <b>Erythrocytes</b>                                           | -0.15 (-0.23--0.19)    | -0.13 (-0.49--0.70)     | 0.972          |
| <b>Extracellular matrix (I)</b>                               | -1.15 (-1.15--0.85)    | -0.63 (-1.13--0.36)     | 0.214          |
| <b>Extracellular region cluster</b>                           | -0.08 (-0.15--0.03)    | -0.10 (-0.28--0.02)     | 0.972          |
| <b>Inflammation (IV)</b>                                      | 0.25 (-0.14--0.49)     | 0.12 (-0.06--0.36)      | 0.915          |
| <b>Inflammation (VI)</b>                                      | 0.25 (-0.22--0.36)     | 0.02 (-0.22--0.15)      | 0.455          |
| <b>Inositol phosphate metabolism</b>                          | -0.39 (-0.55--0.28)    | -0.10 (-0.38--0.32)     | 0.644          |
| <b>Interferon</b>                                             | 1.71 (1.33--2.10)      | 0.58 (0.04--1.73)       | 0.546          |
| <b>Interferon (II)</b>                                        | 0.70 (0.54--0.93)      | 0.28 (0.13--0.66)       | 0.303          |
| <b>MAPK-RAS signalling</b>                                    | 0.16 (-0.46--0.28)     | 0.03 (-0.59--0.35)      | 0.972          |
| <b>Monocytes</b>                                              | 0.38 (0.25--1.09)      | 0.21 (-0.18--0.65)      | 0.303          |
| <b>Plasma cells, immunoglobulins</b>                          | -0.34 (-0.73--0.61)    | -0.10 (-0.58--0.73)     | 0.804          |
| <b>Platelets</b>                                              | 0.28 (0.23--1.02)      | -0.18 (-0.46--0.25)     | 0.110          |
| <b>Protein synthesis (I)</b>                                  | -0.68 (-1.12--0.18)    | -0.44 (-0.91--0.10)     | 0.499          |
| <b>Regulation of antigen presentation and immune response</b> | -1.15 (-1.17--1.06)    | -0.80 (-1.35--0.13)     | 0.455          |
| <b>Regulation of transcription, transcription factors</b>     | -0.82 (-0.85--0.26)    | -0.39 (-0.84--0.11)     | 0.644          |

Data are presented as median (interquartile range). The total number of patients with available data is indicated. All *p* values are derived from non-parametrical Mann-Whitney *U* tests. Statistically significant *p* values are in bold.

CORO1A-DEF6: coronin 1A- differentially expressed in FDCP 6 homolog; Ig: immunoglobulin; LN: lupus nephritis; MAPK: mitogen-activated protein kinase.

**Supplementary Table S32. Z-scores of replicated gene modules in patients with LN and anti-U1RNP positivity versus negative patients**

| Gene module                                                   | Anti-U1RNP (+)<br>N=5 | Anti-U1RNP (-)<br>N=20 | <i>p</i> value |
|---------------------------------------------------------------|-----------------------|------------------------|----------------|
| <b>B cell</b>                                                 | 0.01 (-0.65–0.03)     | -1.84 (-2.40–-1.11)    | 0.089          |
| <b>Cell cycle, mitotic phase</b>                              | -0.76 (-1.05–-0.48)   | -0.29 (-0.87–-0.01)    | 0.197          |
| <b>CORO1A-DEF6 network</b>                                    | -0.04 (-0.09–0.02)    | -0.13 (-0.33–0.02)     | 0.342          |
| <b>Enriched in antigen presentation (III)</b>                 | 0.03 (-0.44–0.20)     | -0.41 (-0.75–-0.15)    | 0.174          |
| <b>Enriched in neutrophils (II)</b>                           | 0.02 (-0.14–0.17)     | 0.09 (-0.07–0.19)      | 0.541          |
| <b>Erythrocytes</b>                                           | 0.19 (-0.13–0.72)     | -0.16 (-0.49–0.60)     | 0.248          |
| <b>Extracellular matrix (I)</b>                               | -0.48 (-0.58–-0.33)   | -0.80 (-1.30–-0.52)    | 0.221          |
| <b>Extracellular region cluster</b>                           | -0.29 (-0.42–-0.25)   | -0.09 (-0.26–0.05)     | 0.118          |
| <b>Inflammation (IV)</b>                                      | 0.25 (-0.50–0.29)     | 0.14 (-0.04–0.41)      | 0.587          |
| <b>Inflammation (VI)</b>                                      | 0.07 (-0.14–0.20)     | 0.01 (-0.26–0.21)      | 0.634          |
| <b>Inositol phosphate metabolism</b>                          | -0.28 (-0.55–-0.11)   | 0.07 (-0.39–0.43)      | 0.118          |
| <b>Interferon</b>                                             | 0.58 (0.30–1.71)      | 1.41 (0.04–2.25)       | 0.587          |
| <b>Interferon (II)</b>                                        | 0.24 (0.13–0.76)      | 0.53 (0.20–0.69)       | 0.839          |
| <b>MAPK–RAS signalling</b>                                    | 0.52 (0.36–0.55)      | -0.27 (-0.68–0.29)     | 0.007          |
| <b>Monocytes</b>                                              | 0.38 (0.09–0.38)      | 0.23 (-0.24–1.01)      | 0.684          |
| <b>Plasma cells, immunoglobulins</b>                          | -0.23 (-0.55–-0.10)   | -0.10 (-0.77–0.79)     | 0.786          |
| <b>Platelets</b>                                              | 0.23 (0.01–0.67)      | -0.10 (-0.43–0.31)     | 0.248          |
| <b>Protein synthesis (I)</b>                                  | -0.26 (-1.27–-0.04)   | -0.45 (-0.92–0.20)     | 0.415          |
| <b>Regulation of antigen presentation and immune response</b> | -0.64 (-1.12–-0.29)   | -0.96 (-1.41–-0.17)    | 0.839          |
| <b>Regulation of transcription, transcription factors</b>     | -0.82 (-1.10–-0.35)   | -0.42 (-0.72–0.11)     | 0.277          |

Data are presented as median (interquartile range). The total number of patients with available data is indicated. All *p* values are derived from non-parametrical Mann-Whitney *U* tests. Statistically significant *p* values are in bold.

CORO1A-DEF6: coronin 1A- differentially expressed in FDCP 6 homolog; Ig: immunoglobulin; LN: lupus nephritis; MAPK: mitogen-activated protein kinase.

**Supplementary Table S33. The most enriched signalling molecule networks in patients with LN**

| Regulator                                                                 | Motif ID                                   | AUC   | NES   | Targets | TFs |
|---------------------------------------------------------------------------|--------------------------------------------|-------|-------|---------|-----|
| <b>Interferon gene module</b>                                             |                                            |       |       |         |     |
| <i>STAT1</i>                                                              | factorbook-STAT2                           | 0.229 | 22.37 | 59      | 13  |
| <i>IRF8</i>                                                               | taipale-NCGAAACCGAAACY-IRF8-DBD            | 0.207 | 20.12 | 57      | 8   |
| <i>STAT1</i>                                                              | jaspar-MA0137.1                            | 0.206 | 19.98 | 65      | 12  |
| <b>Interferon (II) gene module</b>                                        |                                            |       |       |         |     |
| <i>IRF9</i>                                                               | taipale-AWCGAAACCGAAACY-IRF9-full          | 0.147 | 13.16 | 48      | 6   |
| <i>IRF8</i>                                                               | taipale-NCGAAACCGAAACT-IRF8-full           | 0.140 | 12.47 | 47      | 6   |
| <i>IRF8</i>                                                               | taipale-NCGAAACCGAAACY-IRF8-DBD            | 0.136 | 12.03 | 24      | 8   |
| <b>B cell gene module</b>                                                 |                                            |       |       |         |     |
| <i>SOX10</i>                                                              | tfdimers-MD00329                           | 0.101 | 4.78  | 12      | 2   |
| <i>PRDM1</i>                                                              | flyfactorsurvey-Blimp-1_SOLEXA_FBgn0035625 | 0.096 | 4.42  | 24      | 14  |
| <i>TBX2</i>                                                               | taipale-NAGGTGTGAWN-TBX2-full              | 0.095 | 4.36  | 11      | 12  |
| <b>Plasma cells, immunoglobulins gene module</b>                          |                                            |       |       |         |     |
| <i>TFDP3</i>                                                              | transfac_pro-M00920                        | 0.079 | 8.38  | 65      | 8   |
| <i>NFYC</i>                                                               | yetfasco-1537                              | 0.077 | 8.03  | 96      | 4   |
| <i>NFYC</i>                                                               | jaspar-MA0316.1                            | 0.076 | 7.91  | 95      | 4   |
| <b>Regulation of transcription, transcription factors</b>                 |                                            |       |       |         |     |
| <i>YY1</i>                                                                | flyfactorsurvey-phol_SOLEXA_5_FBgn0035997  | 0.162 | 8.83  | 18      | 3   |
| <i>YY1</i>                                                                | flyfactorsurvey-phol_SANGER_5_FBgn0035997  | 0.149 | 8.04  | 9       | 2   |
| <i>YY1</i>                                                                | factorbook-YY1                             | 0.143 | 7.73  | 19      | 3   |
| <b>Cell cycle, mitotic phase gene module</b>                              |                                            |       |       |         |     |
| <i>YY1</i>                                                                | jaspar-PF0063.1                            | 0.059 | 4.50  | 25      | 1   |
| <i>NANOS1</i>                                                             | hdpi-NANOS1                                | 0.058 | 4.40  | 9       | 1   |
| <i>YY1</i>                                                                | flyfactorsurvey-phol_SOLEXA_5_FBgn0035997  | 0.057 | 4.32  | 39      | 3   |
| <b>Protein synthesis (I) gene module</b>                                  |                                            |       |       |         |     |
| <i>ZBTB33</i>                                                             | jaspar-PF0008.1                            | 0.030 | 3.91  | 143     | 1   |
| <i>ZBTB33</i>                                                             | factorbook-UA1                             | 0.029 | 3.56  | 108     | 1   |
| <i>ZBTB33</i>                                                             | homer-M00076                               | 0.029 | 3.54  | 135     | 1   |
| <b>Extracellular matrix (I) gene module</b>                               |                                            |       |       |         |     |
| <i>NRF1</i>                                                               | factorbook-NRF1                            | 0.037 | 5.32  | 202     | 2   |
| <i>NRF1</i>                                                               | swissregulon-NRF1.p2                       | 0.036 | 5.09  | 131     | 2   |
| <i>ZSCAN10</i>                                                            | jaspar-PF0001.1                            | 0.036 | 4.91  | 191     | 3   |
| <b>Regulation of antigen presentation and immune response gene module</b> |                                            |       |       |         |     |
| <i>PRDM2</i>                                                              | yetfasco-1185                              | 0.027 | 4.29  | 562     | 9   |
| <i>ZNF143</i>                                                             | jaspar-PF0113.1                            | 0.027 | 4.15  | 82      | 1   |
| <i>CUX1</i>                                                               | homer-M00467                               | 0.027 | 4.09  | 90      | 2   |

Genes in replicated gene modules with a mean  $|z\text{-score}| > 1$  in at least one LN patient subgroup were imputed in iRegulon through Cytoscape to generate signalling molecule networks and identify their chief regulators. The top chief regulators and enriched motifs are displayed.

AUC: area under the curve; LN: lupus nephritis; NES: normalised enrichment score; TFs: transcription factors.

# Supplementary Figure S1. The *NRF1* signalling molecule network and annotated drug targets in patients with lupus nephritis

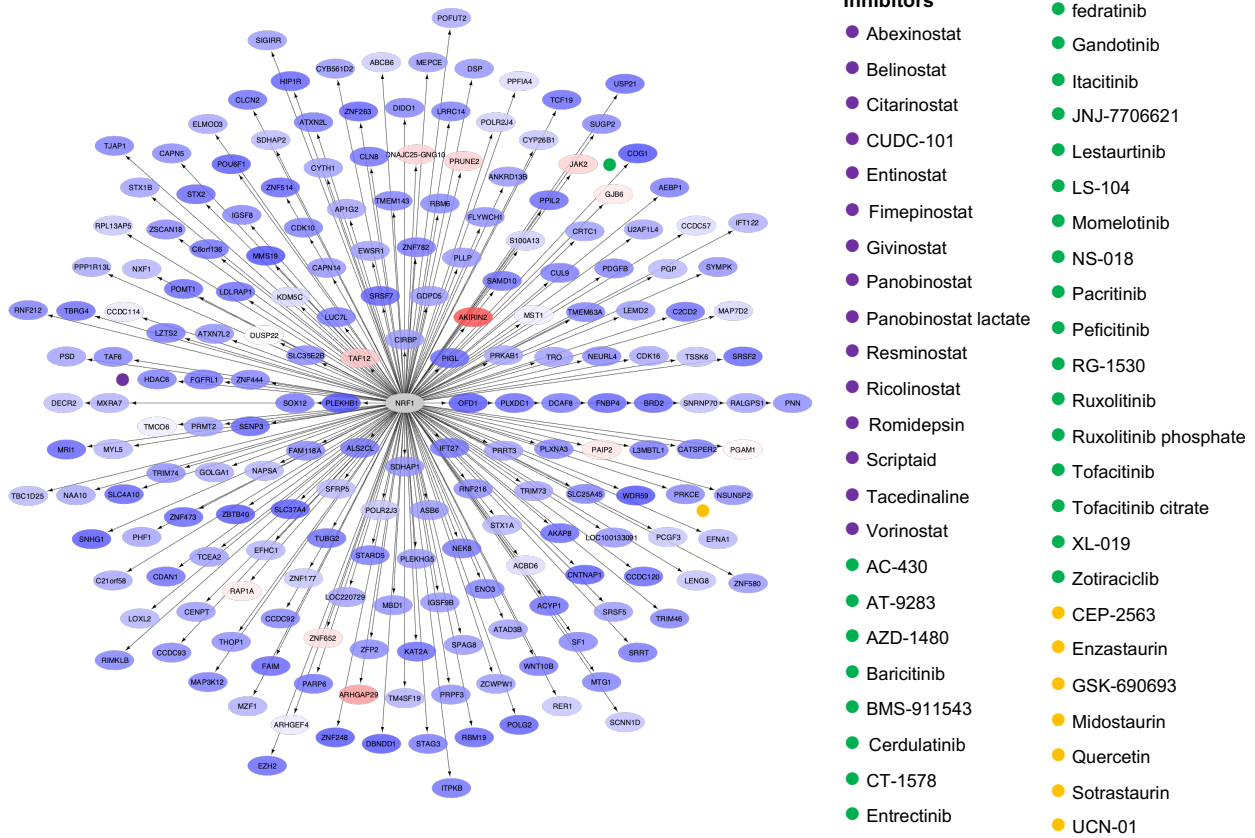

Genes in the extracellular matrix (I) gene module were imputed in iRegulon through Cytoscape to generate signalling molecule networks and identify their chief regulators. One of the most enriched signalling molecule networks is plotted, with the chief regulator *NRF1* in the central node. The colour of the nodes ranges from light blue (downregulated genes) to increasing intensities of red (upregulated genes) based on the gene dysregulation (z-scores) in the lo-IFN patient subgroup. Inhibiting drugs and their upregulated targets are indicated by coloured dots.

IFN: interferon; lo; low.



**Supplementary Figure S2. The *YY1* signalling molecule network and annotated drug targets in patients with lupus nephritis**

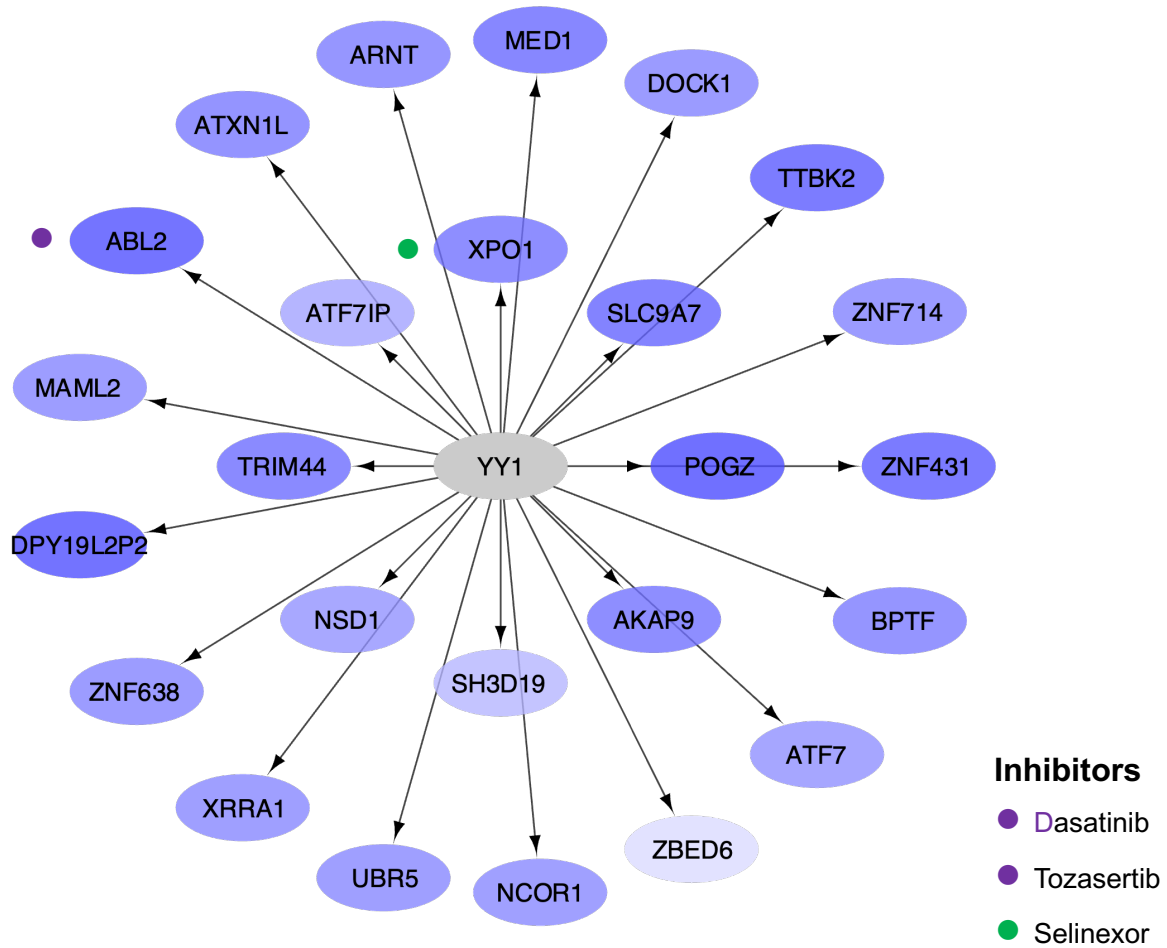

Genes in the cell cycle, mitotic phase gene module were imputed in iRegulon through Cytoscape to generate signalling molecule networks and identify their chief regulators. One of the most enriched signalling molecule networks is plotted, with the chief regulator *YY1* in the central node. The colour of the nodes ranges from light blue (downregulated genes) to increasing intensities of red (upregulated genes) based on the gene dysregulation (z-scores) in the lo-IFN patient subgroup. Inhibiting drugs and their upregulated targets are indicated by coloured dots.

IFN: interferon; lo; low.

**Supplementary Figure S3. The *ZBTB33* signalling molecule network and annotated drug targets in patients with lupus nephritis**

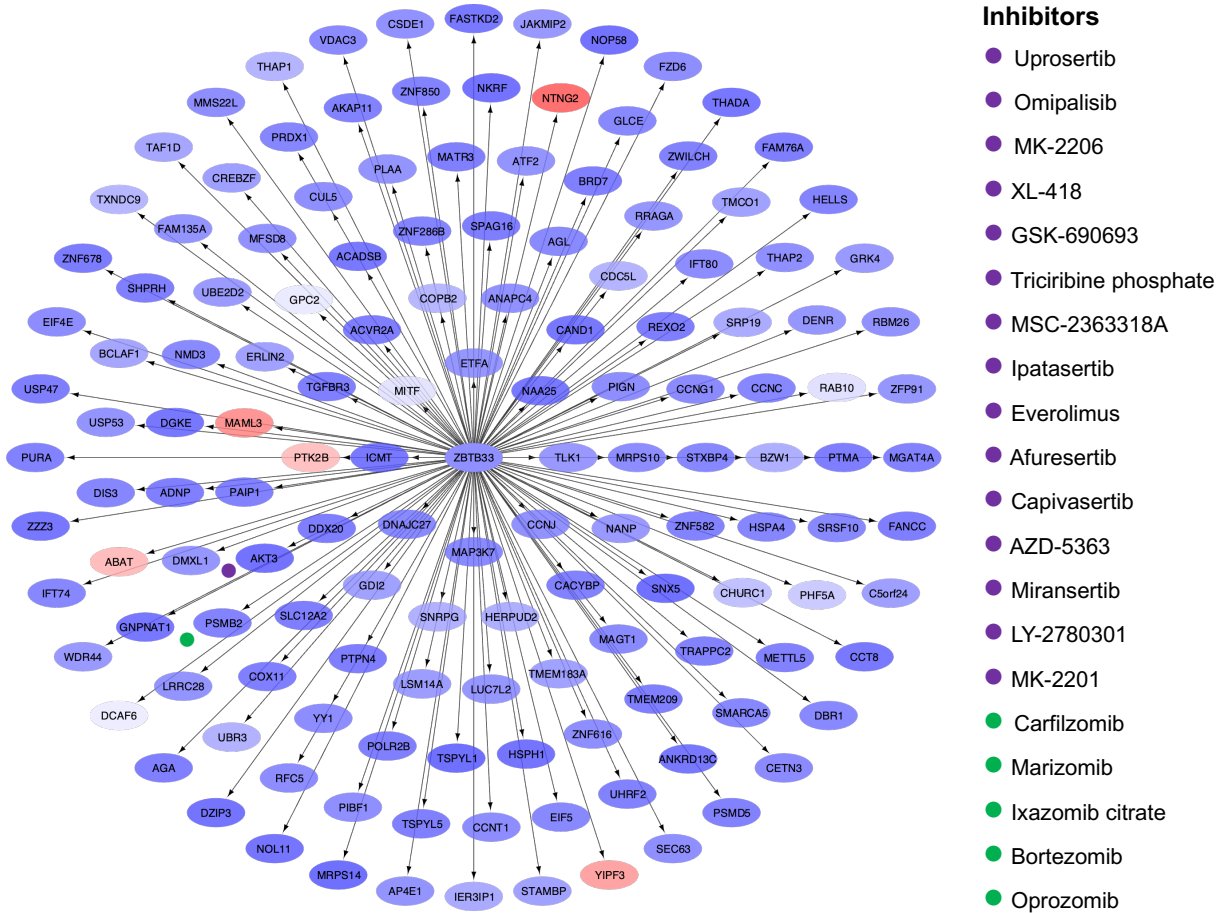

Genes in the protein synthesis (I) gene module were imputed in iRegulon through Cytoscape to generate signalling molecule networks and identify their chief regulators. One of the most enriched signalling molecule networks is plotted, with the chief regulator *ZBTB33* in the central node. The colour of the nodes ranges from light blue (downregulated genes) to increasing intensities of red (upregulated genes) based on the gene dysregulation (z-scores) in the lo-IFN patient subgroup. Inhibiting drugs and their upregulated targets are indicated by coloured dots.

IFN: interferon; lo; low.

**Supplementary Figure S4. The *PRDM2* signalling molecule network and annotated drug targets in patients with lupus nephritis**

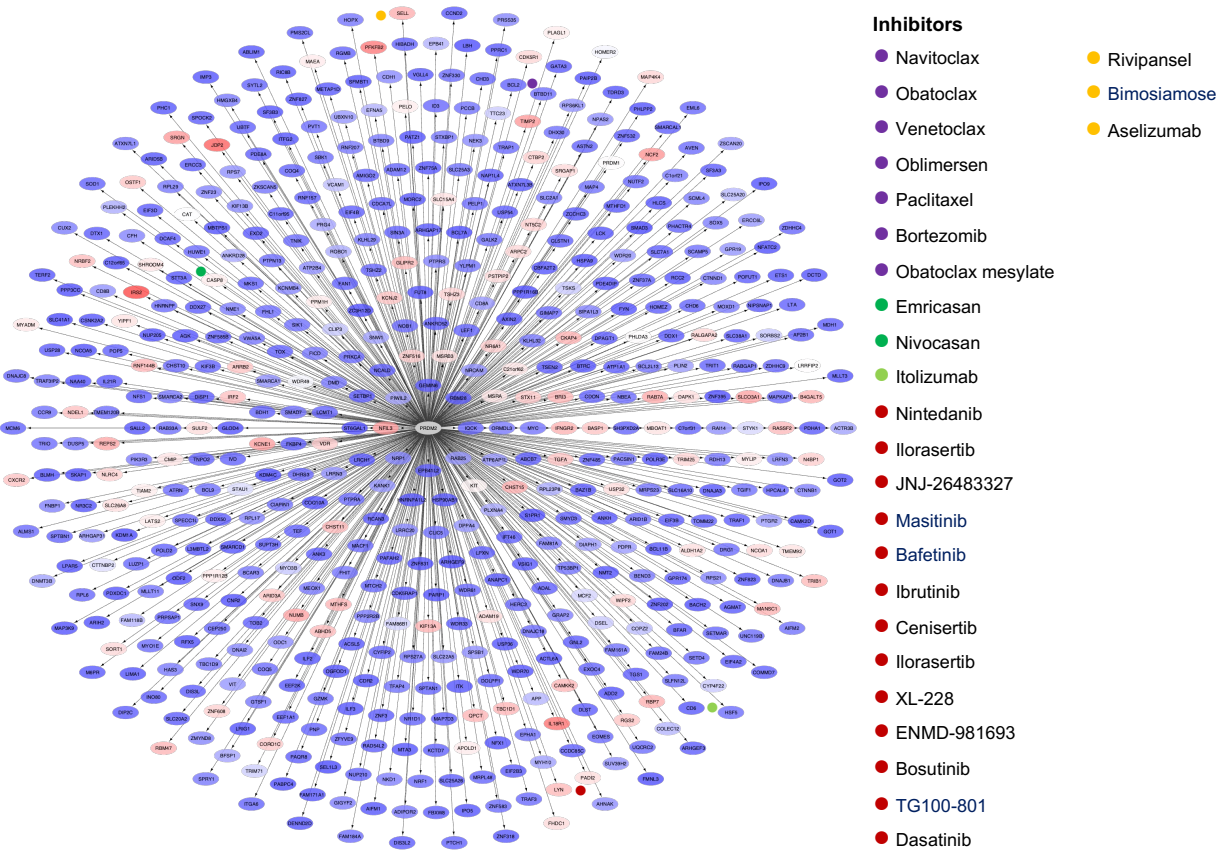

Genes in the regulation of transcription, transcription factors gene module were imputed in iRegulon through Cytoscape to generate signalling molecule networks and identify their chief regulators. One of the most enriched signalling molecule networks is plotted, with the chief regulator *PRDM2* in the central node. The colour of the nodes ranges from light blue (downregulated genes) to increasing intensities of red (upregulated genes) based on the gene dysregulation (z-scores) in the lo-IFN patient subgroup. Inhibiting drugs and their upregulated targets are indicated by coloured dots.

IFN: interferon; lo: low.

**Supplementary Table S34. Response scores to selected targets in patients with LN**

| Target                 | lo-IFN<br>subgroup<br>N=13 | im-IFN<br>subgroup<br>N=9 | hi-IFN<br>subgroup<br>N=19 | lo-IFN<br>vs<br>im-IFN<br><i>p</i> value | lo-IFN<br>vs<br>hi-IFN<br><i>p</i> value | im-IFN<br>vs<br>hi-IFN<br><i>p</i> value |
|------------------------|----------------------------|---------------------------|----------------------------|------------------------------------------|------------------------------------------|------------------------------------------|
| <b>IFNAR</b>           | 0.58□0.05                  | 0.55□0.03                 | 0.60□0.05                  | 0.133                                    | 0.309                                    | <b>0.015</b>                             |
| <b>CD22</b>            | 0.07□0.01                  | 0.08□0.00                 | 0.08□0.01                  | 0.077                                    | <b>0.027</b>                             | 0.539                                    |
| <b>BAFF</b>            | 0.25□0.02                  | 0.24□0.02                 | 0.25□0.03                  | 0.171                                    | 0.803                                    | 0.337                                    |
| <b>BAFF and APRIL</b>  | 0.25□0.02                  | 0.24□0.02                 | 0.25□0.03                  | 0.171                                    | 0.803                                    | 0.337                                    |
| <b>BAFFR</b>           | 0.03□0.01                  | 0.04□0.01                 | 0.03□0.01                  | <b>0.010</b>                             | 0.309                                    | 0.052                                    |
| <b>Calcineurin</b>     | 0.07□0.01                  | 0.05□0.01                 | 0.05□0.01                  | <b>0.001</b>                             | < <b>0.001</b>                           | 0.446                                    |
| <b>C5</b>              | 0.01□0.00                  | 0.01□0.00                 | 0.01□0.00                  | 0.217                                    | 0.454                                    | 0.363                                    |
| <b>CD19</b>            | 0.18□0.08                  | 0.26□0.03                 | 0.22□0.04                  | <b>0.005</b>                             | 0.328                                    | <b>0.010</b>                             |
| <b>CD38</b>            | 0.36□0.02                  | 0.40□0.05                 | 0.40□0.03                  | <b>0.021</b>                             | < <b>0.001</b>                           | 0.476                                    |
| <b>mTORC1</b>          | 0.76□0.04                  | 0.71□0.03                 | 0.72□0.04                  | <b>0.001</b>                             | <b>0.003</b>                             | 0.337                                    |
| <b>CCR1</b>            | 0.00□0.00                  | 0.00□0.00                 | 0.00□0.01                  | N/A                                      | 0.408                                    | 0.491                                    |
| <b>BTK</b>             | 0.14□0.02                  | 0.17□0.01                 | 0.16□0.01                  | <b>0.001</b>                             | <b>0.001</b>                             | <b>0.029</b>                             |
| <b>Tyrosine kinase</b> | 0.81□0.04                  | 0.75□0.02                 | 0.76□0.05                  | < <b>0.001</b>                           | <b>0.016</b>                             | 0.313                                    |
| <b>JAK1/JAK2</b>       | 0.96□0.04                  | 0.89□0.03                 | 0.93□0.05                  | <b>0.001</b>                             | 0.388                                    | <b>0.022</b>                             |

Data are presented as mean (standard deviation). All *p* values are derived from non-parametrical Mann-Whitney *U* tests. Statistically significant *p* values are in bold.

APRIL: a proliferation-inducing ligand; BAFF: B cell activating factor belonging to the tumour necrosis factor family; BAFFR; B cell activating factor belonging to the tumour necrosis factor family; BTK: Bruton's tyrosine kinase; C5: complement component 5; hi: high; IFN: interferon; IFNAR: interferon- $\alpha/\beta$  receptor; im: intermediate; N/A: not applicable; JAK: Janus kinase; LN: lupus nephritis; lo: low; mTORC1: mammalian target of rapamycin complex 1.

**Supplementary Table S35. LN patients with anticipated response to selected drug targets**

| Target                 | lo-IFN subgroup | im-IFN subgroup | hi-IFN subgroup | lo-IFN vs im-IFN | lo-IFN vs hi-IFN | im-IFN vs hi-IFN |
|------------------------|-----------------|-----------------|-----------------|------------------|------------------|------------------|
|                        | N=13            | N=9             | N=19            | <i>p</i> value   | <i>p</i> value   | <i>p</i> value   |
| <b>IFNAR</b>           | 5 (38.5%)       | 1 (11.1%)       | 14 (73.7%)      | 0.333            | 0.104            | <b>0.004</b>     |
| <b>CD22</b>            | 4 (30.8%)       | 6 (66.7%)       | 14 (73.7%)      | 0.192            | <b>0.041</b>     | 1.000            |
| <b>BAFF</b>            | 7 (53.8%)       | 3 (33.3%)       | 10 (52.6%)      | 0.415            | 1.000            | 0.435            |
| <b>BAFF and APRIL</b>  | 7 (53.8%)       | 3 (33.3%)       | 10 (52.6%)      | 0.415            | 1.000            | 0.435            |
| <b>BAFFR</b>           | 6 (46.2%)       | 8 (88.9%)       | 12 (63.2%)      | 0.074            | 0.556            | 0.214            |
| <b>Calcineurin</b>     | 12 (92.3%)      | 2 (22.2%)       | 5 (26.3%)       | <b>0.001</b>     | <b>0.001</b>     | 1.000            |
| <b>C5</b>              | 4 (30.8%)       | 6 (66.7%)       | 10 (52.6%)      | 0.192            | 0.389            | 0.687            |
| <b>CD19</b>            | 5 (38.5%)       | 8 (88.9%)       | 8 (42.1%)       | <b>0.031</b>     | 1.000            | <b>0.039</b>     |
| <b>CD38</b>            | 0 (0.0%)        | 4 (44.4%)       | 13 (68.4%)      | <b>0.017</b>     | <b>&lt;0.001</b> | 0.409            |
| <b>mTORC1</b>          | 10 (76.9%)      | 1 (11.1%)       | 5 (26.3%)       | <b>0.008</b>     | <b>0.014</b>     | 0.630            |
| <b>CCR1</b>            | 0 (0.0%)        | 0 (0.0%)        | 1 (5.3%)        | 1.000            | 1.000            | 1.000            |
| <b>BTK</b>             | 1 (7.7%)        | 9 (100.0%)      | 12 (63.2%)      | <b>&lt;0.001</b> | <b>0.003</b>     | 0.062            |
| <b>Tyrosine kinase</b> | 12 (92.3%)      | 1 (11.1%)       | 6 (31.6%)       | <b>&lt;0.001</b> | <b>0.002</b>     | 0.371            |
| <b>JAK1/JAK2</b>       | 10 (76.9%)      | 0 (0.0%)        | 12 (63.2%)      | <b>&lt;0.001</b> | 0.467            | <b>0.003</b>     |

Data are presented as number (percentage). All *p* values are derived from Pearson's chi squared ( $\chi^2$ ) or Fisher's exact tests. Statistically significant *p* values are in bold.

APRIL: a proliferation-inducing ligand; BAFF: B cell activating factor belonging to the tumour necrosis factor family; BAFFR; B cell activating factor belonging to the tumour necrosis factor family; BTK: Bruton's tyrosine kinase; C5: complement component 5; hi: high; IFN: interferon; IFNAR: interferon- $\alpha/\beta$  receptor; im: intermediate; JAK: Janus kinase; LN: lupus nephritis; lo: low; mTORC1: mammalian target of rapamycin complex 1.
